# Supplementary material for: Mitochondrial genome of the nonphotosynthetic mycoheterotrophic plant Hypopitys monotropa , its structure, gene expression and RNA editing
Source: PeerJ journal article supplement (doi:10.7717/peerj.9309), 2020-06-19

Supplementary figure 5.

Phylogenetic trees inferred from ML analysis of single mitochondrial genes. Protein coding genes that were annotated in mitochondrial genomes of *Hypopitys monotropa*, *Vaccinium macrocarpon* and all main evolutionary lineages of flowering plants are included in the analysis.

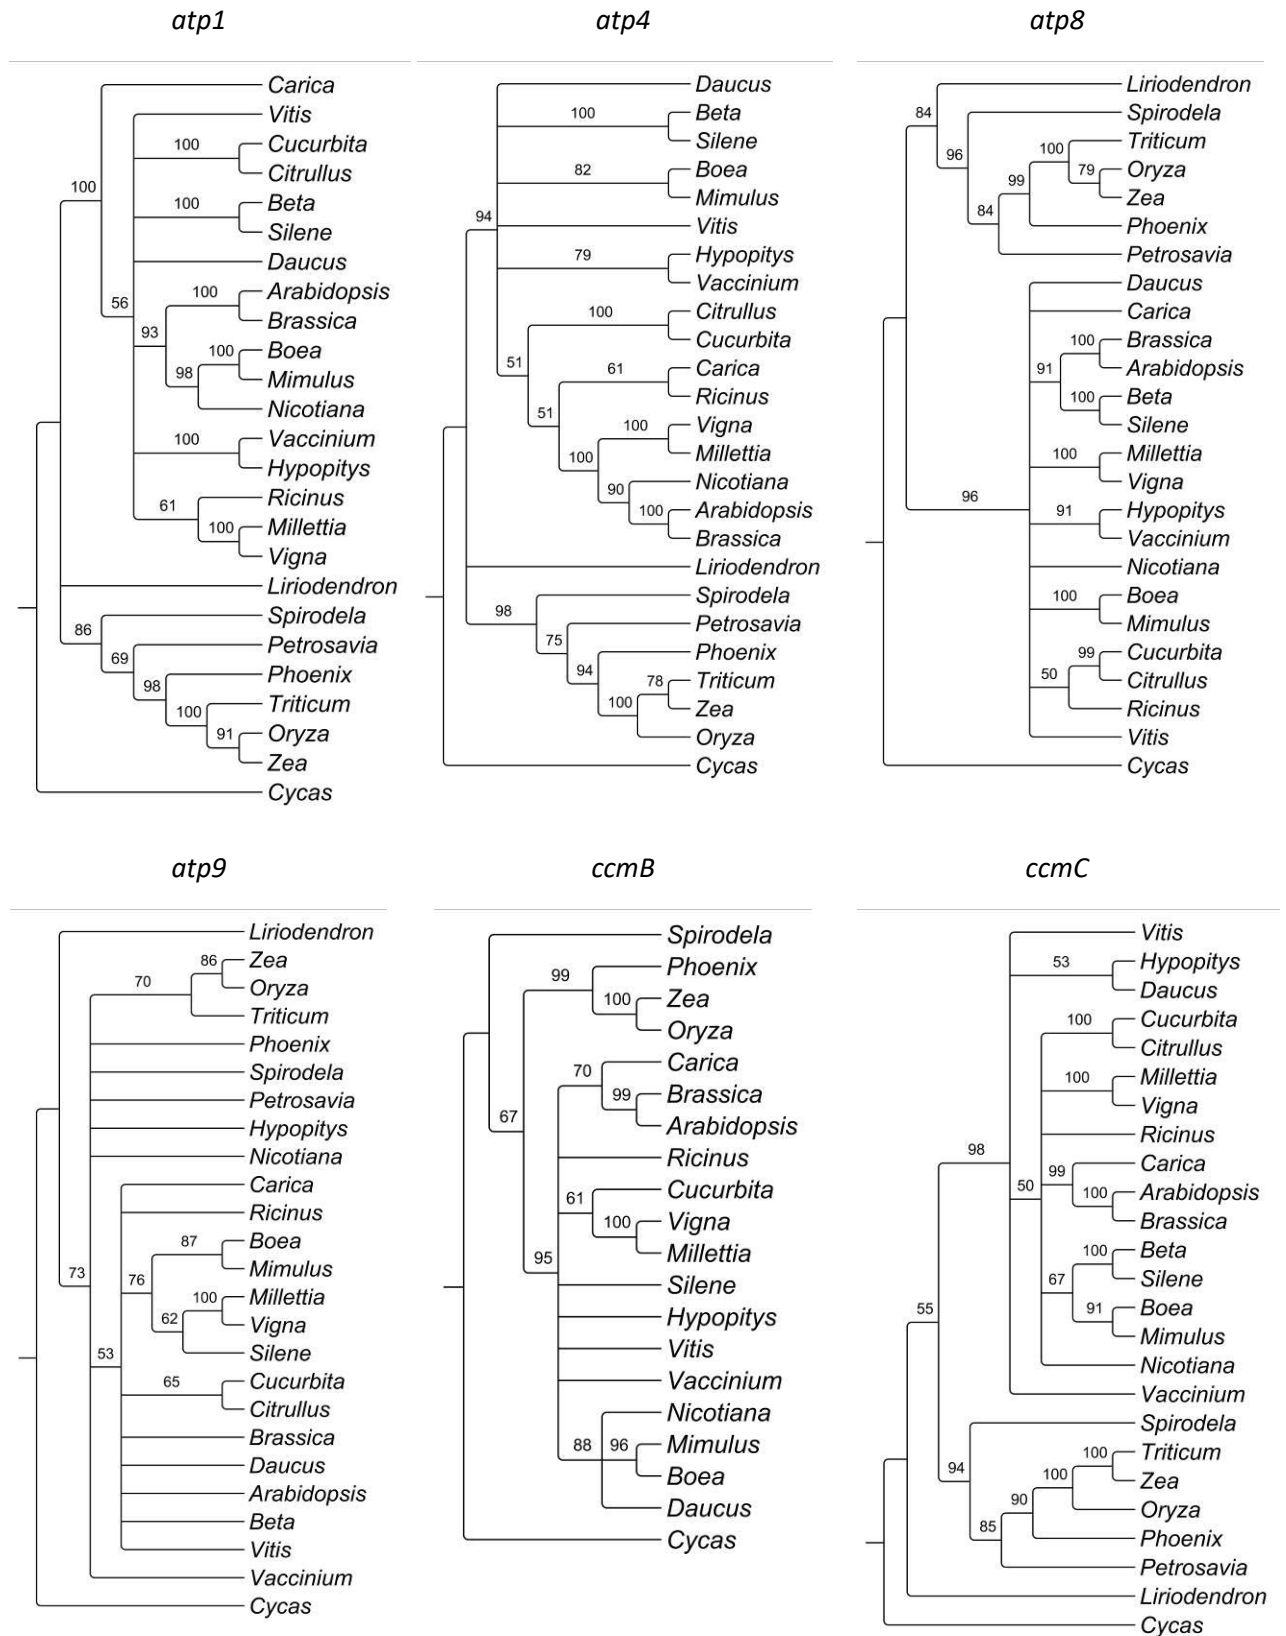

ccmFc

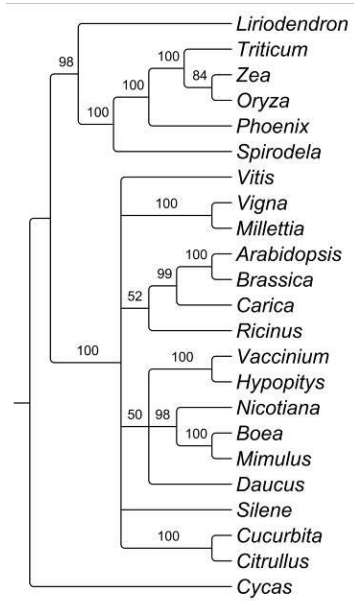

ccmFn

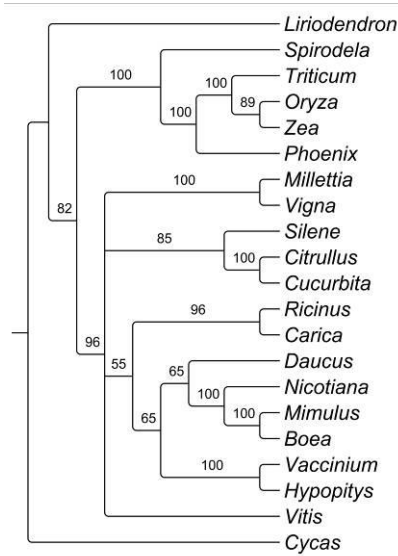

cob

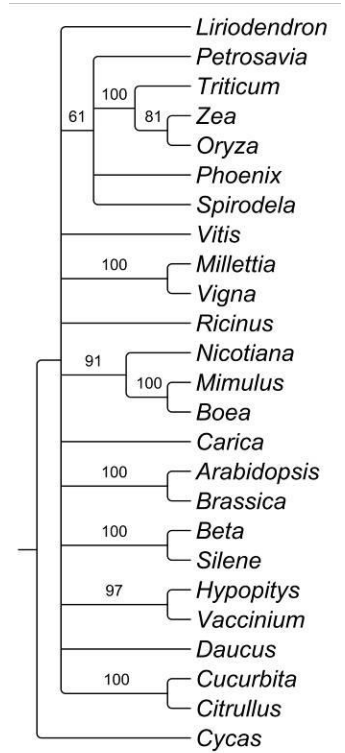

cox1

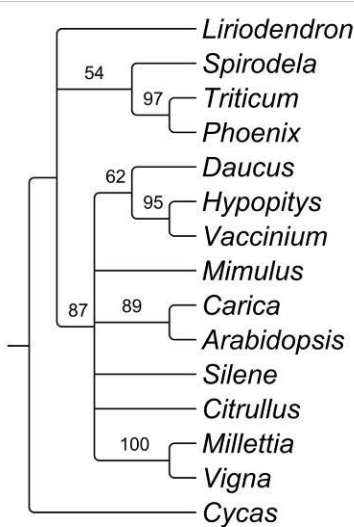

cox2

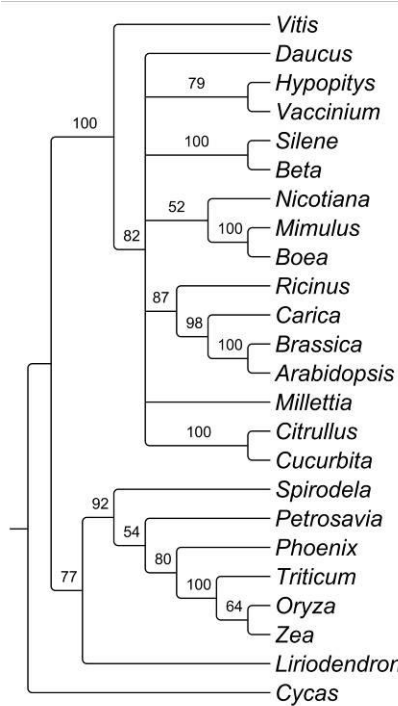

cox3

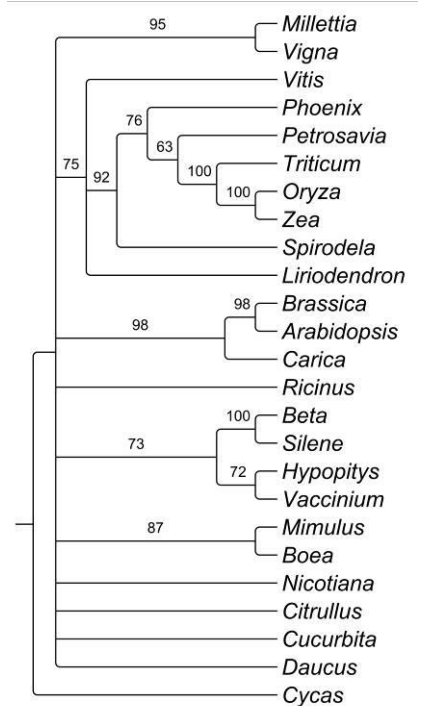

matR

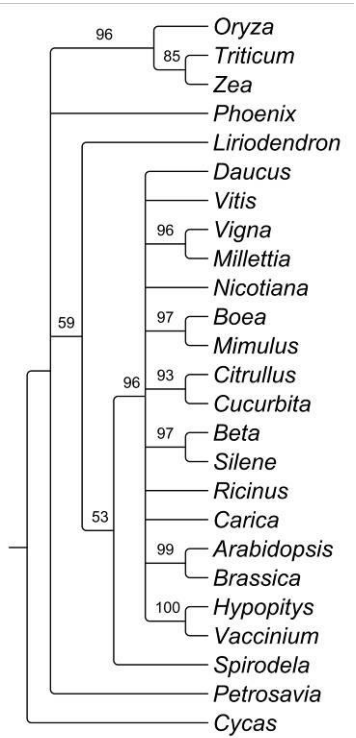

mttB

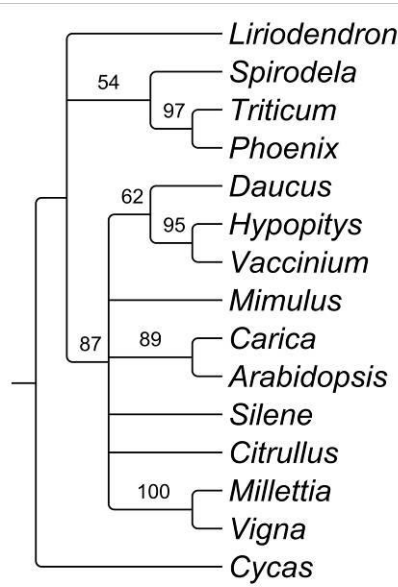

nad1

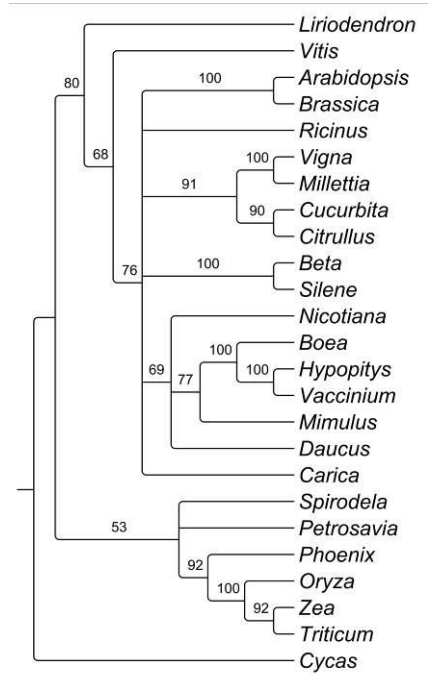

nad2

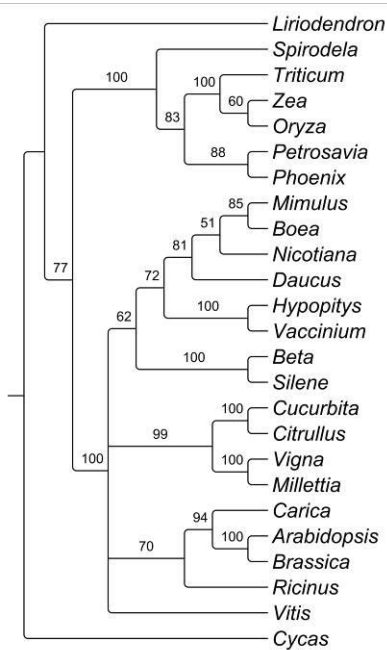

nad3

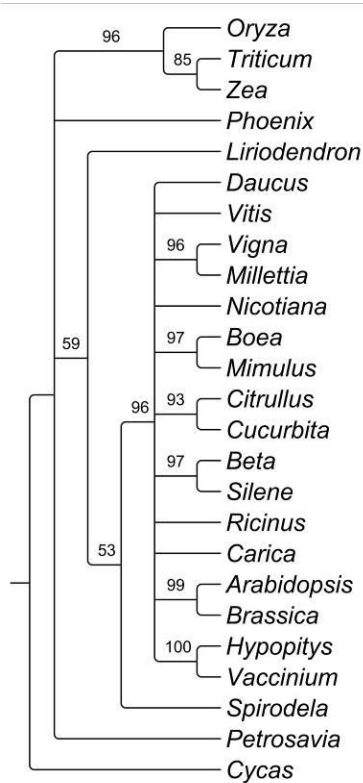

nad4

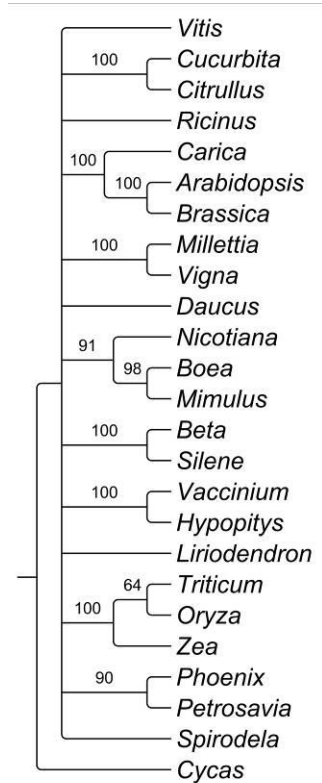



*rpl5*

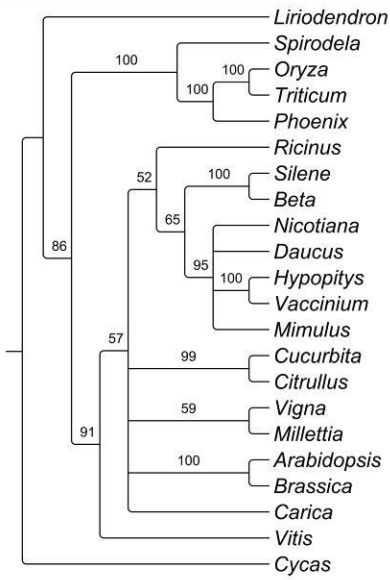

*rpl10*

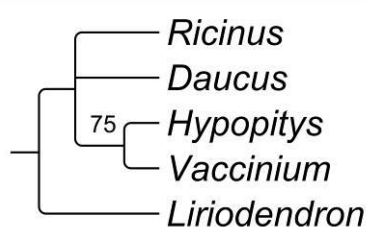

*rpl16*

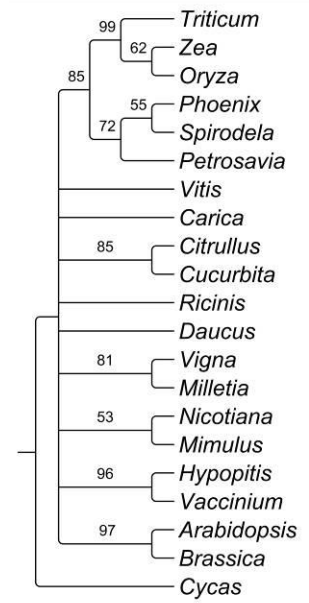

*rps1*

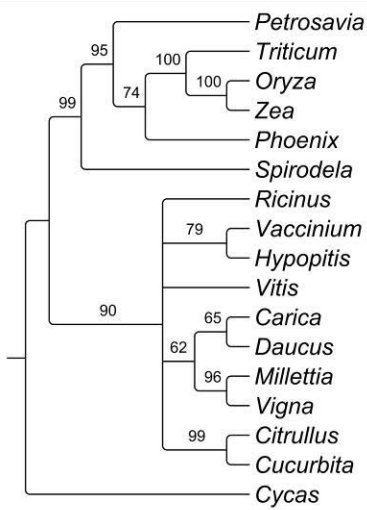

*rps3*

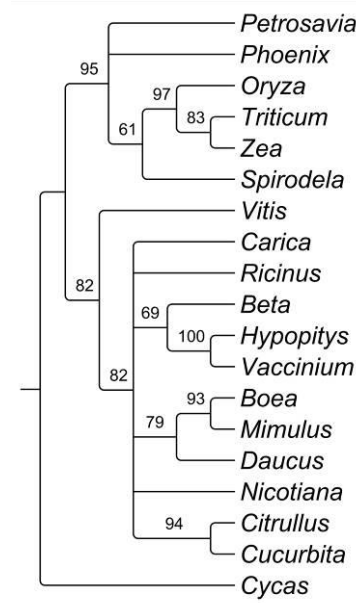

*rps4*

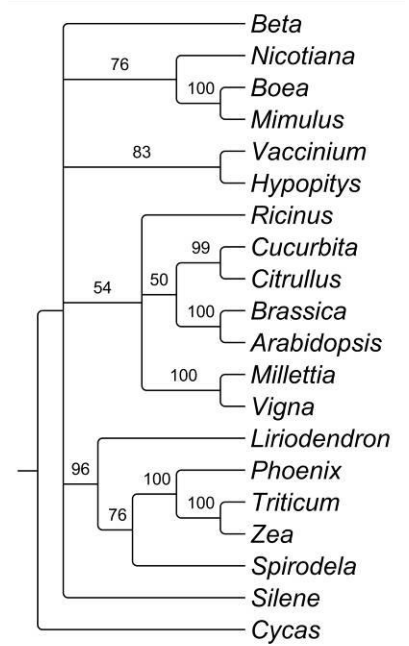

rps10

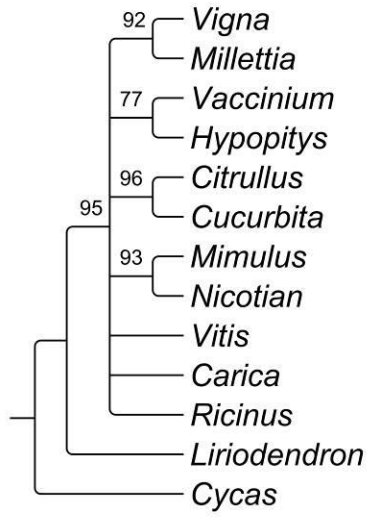

rps12

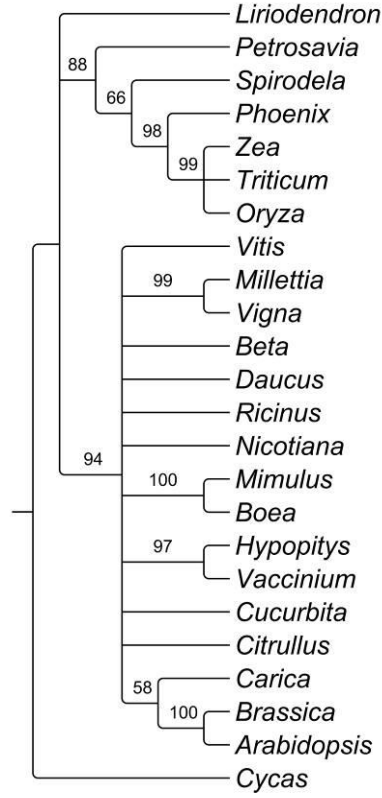

rps13

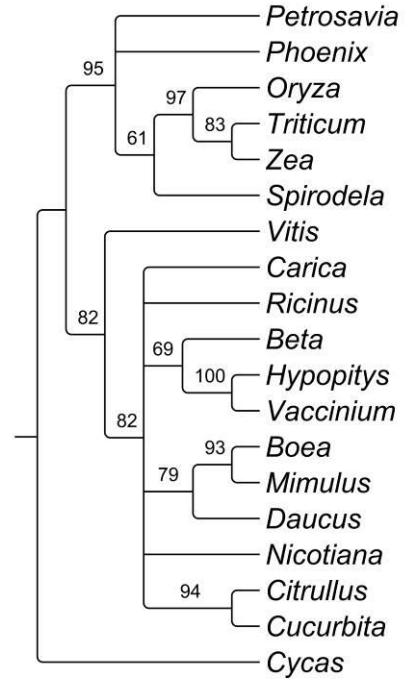

rps14

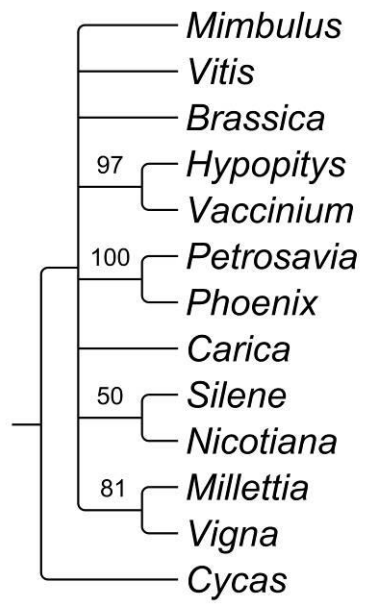

rps19

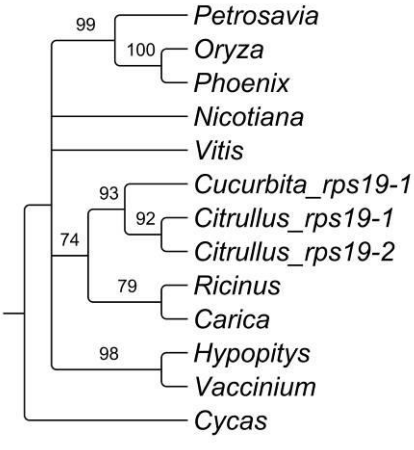

sdh4

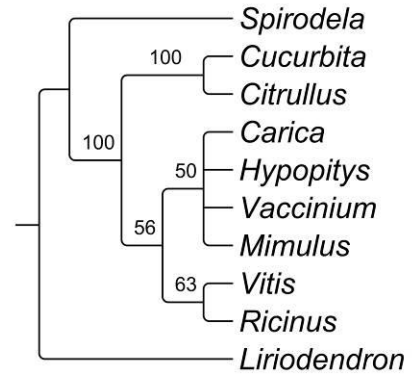

Supplement: Supplementary_figure5_v2_staff_KT.pdf [file Supplementary_figure5_v2_staff_KT.pdf]
