# Supplementary material for: Mitochondrial genome of the nonphotosynthetic mycoheterotrophic plant Hypopitys monotropa, its structure, gene expression and RNA editing
Source: PeerJ. 2020 Jun 19;8:e9309. doi: 10.7717/peerj.9309 (PMC7307570; doi:10.7717/peerj.9309)
Supplement: Supplemental Information 2 [file peerj-08-9309-s002.xlsx]

## Sheet: genes, position and expression
	Chromosome	NCBI accession number	Position	Exons	Length	Expression level*	RNA-editing sites per 100 bases
Complex I
nad1	Linear	MK990822	177486..177872	1	1008	2.96726	1.09127
	Linear	MK990822	515849..515929	2
	Linear	MK990822	517158..517439	3
	Linear	MK990822	482536..482793	4
nad2	Linear	MK990822	554044..554436	2	1467	3.71336	2.52215
	Linear	MK990822	555647..555798	1
	Linear	MK990822	190938..191098	3
	Linear	MK990822	193353..193924	4
	Linear	MK990822	195379..195567	5
nad3	Linear	MK990822	453842..454198		357	4.72829	0.560224
			686707..687063
nad4	Linear	MK990822	593155..593615	1	1488	2.20632	0.268817
			595005..595942	2
			598887..598975	3
nad4L	Linear	MK990822	41698..42000		303	1.71782	5.61056
nad5	Circular	MK990823	79462..79856	4	2013	3.83609	0.200803
	Circular	MK990823	80779..80928	5
	Linear	MK990822	535504..535733	1
	Linear	MK990822	536571..537786	2
	Linear	MK990822	502051-502030	3
nad6	Linear	MK990822	32189..32806		618	3.27265	1.77994
nad7	Linear	MK990822	307010..307152	1	1185	5.74768	2.95359
			307969..308037	2
			308813..309278	3
			310346..310590	4
			312403..312664	5
nad9	Linear	MK990822	4284..4856		573	4.13874	1.7452
			85185..85757
Complex II
sdh3	Linear	MK990822	556411..556731		321	2.97975	0.934579
sdh4	Linear	MK990822	450448..450897		450	16.1844	1.11111
Complex III
cob	Linear	MK990822	241167..242348		1182	6.17217	0.423012
Complex IV
cox1	Circular	MK990823	103223..104080	2	1584	9.95991	0.757576
	Circular	MK990823	105048..105773	1
cox2	Linear	MK990822	681025..681810		786	2.29008	2.03562
cox3	Linear	MK990822	450825..451622		798	11.6134	0.125313
Complex V
atp1	Linear	MK990822	398525..400054		1530	11.4418	0
atp4	Linear	MK990822	42173..42751		579	2.61572	2.24525
atp6	Linear	MK990822	684255..685472		1218	5.79721	2.21675
atp8	Linear	MK990822	452128..452607		480	7.27292	2.08333
atp9	Linear	MK990822	534962..535210		249	38.008	5.62249
Cytochrome c maturation factors
ccmB	Linear	MK990822	73938..74558		621	0.409823	7.56844
ccmC	Linear	MK990822	279245..279997		753	2.73041	5.44489
ccmFc	Circular	MK990823	33479..34245	1	1347	0.858203	2.22717
			35196..35775	2
ccmFn	Linear	MK990822	269170..270891		1722	0.549361	1.68409
Intron maturase
matR	Linear	MK990822	483244..485211		1968	1.15854	0.762195
Protein translocase
mttB	Linear	MK990822	231359..232147		789	4.41825	6.46388
Proteins of the ribosomal large subunit
rpl10	Linear	MK990822	73170..73661		492	4.66972	1.82927
rpl16	Linear	MK990822	661120..661368		249	1.58032	0
rpl2	Linear	MK990822	35865..36749	1	1002	1.56986	0.399202
			38031..38147	2
rpl5	Linear	MK990822	239001..239564		564	3.05408	0.35461
Proteins of the ribosomal small subunit
rps1	Linear	MK990822	500008..500613		606	0.522277	0.49505
rps10	Linear	MK990822	39125..39434	1	447	4.28412	2.01342
			40252..40388	2
rps12	Linear	MK990822	453416..453793		378	6.73016	0
			686281..686658
rps13	Linear	MK990822	514654..515004		351	2.76638	0
rps19	Linear	MK990822	38546..38830		285	3.6	1.75439
			664716..665000
rps3	Linear	MK990822	661532..663149	2	1692	0.946809	0.413712
			664629..664702	1
rps4	Linear	MK990822	33433..34263		831	1.40915	2.40674
rps14	Linear	MK990822	239566..239841	Pseudo
Other
ORF671	Linear	MK990822	249360..251375		2016	0.100446	0
tRNAs
trnC-GCA	Circular	MK990823	36753..36825
trnK-UUU	Linear	MK990822	1306..1378
trnK-UUU	Linear	MK990822	82207..82279
trnW-CCA	Linear	MK990822	5341..5414
trnW-CCA	Linear	MK990822	86242..86315
trnE-UUC	Linear	MK990822	111416..111487
trnQ-GGC	Linear	MK990822	114225..114297
trnQ-UUG	Linear	MK990822	116495..116566
trnH-GUG	Linear	MK990822	153232..153307
trnM-CAU	Linear	MK990822	180468..180536
trnM-CAU	Linear	MK990822	589974..590045
trnM-CAU	Linear	MK990822	621488..621560
trnC-GCA	Linear	MK990822	187438..187508
trnN-GUU	Linear	MK990822	189252..189323
trnY-GUA	Linear	MK990822	190360..190442
trnU-UCA	Linear	MK990822	279182..279258	Pseudo?
trnfM-CAU	Linear	MK990822	384797..384870
trnD-GUC	Linear	MK990822	589743..589816
trnD-GUC	Linear	MK990822	649803..649839	2
	Linear	MK990822	649851..649887	1
trnS-GCU	Linear	MK990822	623397..623484
trnS-UGA	Linear	MK990822	646660..646747
trnF-GAA	Linear	MK990822	623837..623910
trnP-UGG	Linear	MK990822	624166..624240
trnI-CAU	Linear	MK990822	670111..670191
rRNAs
ribosomal RNA small subunit	Linear	MK990822	350044..351971
ribosomal RNA large subunit	Linear	MK990822	385237..388831
* Number of mapped read pairs divided by gene length

## Sheet: gene ontology categories
Gene	Gene Ontology term identifier	Prediction score	Gene Ontology term aspect	Gene Ontology term name
atp1	GO:0003674	0.999	molecular function	molecular_function
atp1	GO:0008150	0.998	biological process	biological_process
atp1	GO:0005575	0.998	cellular component	cellular_component
atp1	GO:0005488	0.996	molecular function	binding
atp1	GO:0110165	0.996	cellular component	cellular anatomical entity
atp1	GO:0005622	0.99	cellular component	intracellular
atp1	GO:0005515	0.982	molecular function	protein binding
atp1	GO:0043227	0.982	cellular component	membrane-bounded organelle
atp1	GO:0043229	0.982	cellular component	intracellular organelle
atp1	GO:0043226	0.982	cellular component	organelle
atp1	GO:0005737	0.979	cellular component	cytoplasm
atp1	GO:0043231	0.979	cellular component	intracellular membrane-bounded organelle
atp1	GO:0016020	0.918	cellular component	membrane
atp1	GO:0043167	0.859	molecular function	ion binding
atp1	GO:1901363	0.841	molecular function	heterocyclic compound binding
atp1	GO:0097159	0.841	molecular function	organic cyclic compound binding
atp1	GO:0005739	0.841	cellular component	mitochondrion
atp1	GO:0008152	0.838	biological process	metabolic process
atp1	GO:0003824	0.83	molecular function	catalytic activity
atp1	GO:0050896	0.813	biological process	response to stimulus
atp1	GO:0009987	0.8	biological process	cellular process
atp1	GO:0005215	0.772	molecular function	transporter activity
atp1	GO:0032991	0.767	cellular component	protein-containing complex
atp1	GO:0031967	0.76	cellular component	organelle envelope
atp1	GO:0031975	0.76	cellular component	envelope
atp1	GO:0046034	0.736	biological process	ATP metabolic process
atp1	GO:0008324	0.73	molecular function	cation transmembrane transporter activity
atp1	GO:0015075	0.73	molecular function	ion transmembrane transporter activity
atp1	GO:0022857	0.73	molecular function	transmembrane transporter activity
atp1	GO:0098796	0.723	cellular component	membrane protein complex
atp1	GO:0015318	0.721	molecular function	inorganic molecular entity transmembrane transporter activity
atp1	GO:0031090	0.711	cellular component	organelle membrane
atp1	GO:0015078	0.708	molecular function	proton transmembrane transporter activity
atp1	GO:0015077	0.708	molecular function	monovalent inorganic cation transmembrane transporter activity
atp1	GO:0022890	0.708	molecular function	inorganic cation transmembrane transporter activity
atp1	GO:0044237	0.708	biological process	cellular metabolic process
atp1	GO:0043168	0.689	molecular function	anion binding
atp1	GO:0006091	0.683	biological process	generation of precursor metabolites and energy
atp1	GO:0009536	0.681	cellular component	plastid
atp1	GO:0006796	0.662	biological process	phosphate-containing compound metabolic process
atp1	GO:0006793	0.662	biological process	phosphorus metabolic process
atp1	GO:0016740	0.647	molecular function	transferase activity
atp1	GO:0015252	0.646	molecular function	proton channel activity
atp1	GO:0005261	0.646	molecular function	cation channel activity
atp1	GO:0005216	0.646	molecular function	ion channel activity
atp1	GO:0015267	0.646	molecular function	channel activity
atp1	GO:0016776	0.646	molecular function	phosphotransferase activity, phosphate group as acceptor
atp1	GO:0046933	0.646	molecular function	proton-transporting ATP synthase activity, rotational mechanism
atp1	GO:0016772	0.646	molecular function	transferase activity, transferring phosphorus-containing groups
atp1	GO:0022803	0.646	molecular function	passive transmembrane transporter activity
atp1	GO:0065007	0.635	biological process	biological regulation
atp1	GO:0046872	0.621	molecular function	metal ion binding
atp1	GO:0043169	0.621	molecular function	cation binding
atp1	GO:0009165	0.616	biological process	nucleotide biosynthetic process
atp1	GO:1901293	0.616	biological process	nucleoside phosphate biosynthetic process
atp1	GO:0009117	0.616	biological process	nucleotide metabolic process
atp1	GO:0018130	0.616	biological process	heterocycle biosynthetic process
atp1	GO:1901362	0.616	biological process	organic cyclic compound biosynthetic process
atp1	GO:0090407	0.616	biological process	organophosphate biosynthetic process
atp1	GO:0044271	0.616	biological process	cellular nitrogen compound biosynthetic process
atp1	GO:0019438	0.616	biological process	aromatic compound biosynthetic process
atp1	GO:0034654	0.616	biological process	nucleobase-containing compound biosynthetic process
atp1	GO:0006753	0.616	biological process	nucleoside phosphate metabolic process
atp1	GO:0006139	0.616	biological process	nucleobase-containing compound metabolic process
atp1	GO:0006725	0.616	biological process	cellular aromatic compound metabolic process
atp1	GO:1901360	0.616	biological process	organic cyclic compound metabolic process
atp1	GO:0046483	0.616	biological process	heterocycle metabolic process
atp1	GO:0055086	0.616	biological process	nucleobase-containing small molecule metabolic process
atp1	GO:0044249	0.616	biological process	cellular biosynthetic process
atp1	GO:0019637	0.616	biological process	organophosphate metabolic process
atp1	GO:1901576	0.616	biological process	organic substance biosynthetic process
atp1	GO:0034641	0.616	biological process	cellular nitrogen compound metabolic process
atp1	GO:0071704	0.616	biological process	organic substance metabolic process
atp1	GO:0044281	0.616	biological process	small molecule metabolic process
atp1	GO:0044238	0.616	biological process	primary metabolic process
atp1	GO:0009058	0.616	biological process	biosynthetic process
atp1	GO:0006807	0.616	biological process	nitrogen compound metabolic process
atp1	GO:0031966	0.613	cellular component	mitochondrial membrane
atp1	GO:0005740	0.613	cellular component	mitochondrial envelope
atp1	GO:0010035	0.601	biological process	response to inorganic substance
atp1	GO:0042221	0.601	biological process	response to chemical
atp4	GO:0005575	0.998	cellular component	cellular_component
atp4	GO:0003674	0.997	molecular function	molecular_function
atp4	GO:0110165	0.997	cellular component	cellular anatomical entity
atp4	GO:0005488	0.992	molecular function	binding
atp4	GO:0005622	0.99	cellular component	intracellular
atp4	GO:0043227	0.99	cellular component	membrane-bounded organelle
atp4	GO:0043229	0.99	cellular component	intracellular organelle
atp4	GO:0043226	0.99	cellular component	organelle
atp4	GO:0008150	0.988	biological process	biological_process
atp4	GO:0005737	0.988	cellular component	cytoplasm
atp4	GO:0043231	0.987	cellular component	intracellular membrane-bounded organelle
atp4	GO:0005515	0.972	molecular function	protein binding
atp4	GO:0005739	0.909	cellular component	mitochondrion
atp4	GO:0009987	0.843	biological process	cellular process
atp4	GO:0050896	0.788	biological process	response to stimulus
atp4	GO:0016020	0.774	cellular component	membrane
atp4	GO:0008152	0.693	biological process	metabolic process
atp4	GO:0016043	0.634	biological process	cellular component organization
atp4	GO:0071840	0.634	biological process	cellular component organization or biogenesis
atp4	GO:0044237	0.609	biological process	cellular metabolic process
atp4	GO:0065007	0.602	biological process	biological regulation
atp6	GO:0003674	0.999	molecular function	molecular_function
atp6	GO:0008150	0.998	biological process	biological_process
atp6	GO:0005575	0.998	cellular component	cellular_component
atp6	GO:0110165	0.996	cellular component	cellular anatomical entity
atp6	GO:0005622	0.993	cellular component	intracellular
atp6	GO:0043227	0.991	cellular component	membrane-bounded organelle
atp6	GO:0043229	0.991	cellular component	intracellular organelle
atp6	GO:0043226	0.991	cellular component	organelle
atp6	GO:0005737	0.99	cellular component	cytoplasm
atp6	GO:0043231	0.989	cellular component	intracellular membrane-bounded organelle
atp6	GO:0005488	0.95	molecular function	binding
atp6	GO:0005515	0.934	molecular function	protein binding
atp6	GO:0003824	0.919	molecular function	catalytic activity
atp6	GO:0022857	0.875	molecular function	transmembrane transporter activity
atp6	GO:0005215	0.875	molecular function	transporter activity
atp6	GO:0005739	0.869	cellular component	mitochondrion
atp6	GO:0009987	0.835	biological process	cellular process
atp6	GO:0008152	0.831	biological process	metabolic process
atp6	GO:0098662	0.828	biological process	inorganic cation transmembrane transport
atp6	GO:1902600	0.828	biological process	proton transmembrane transport
atp6	GO:0009150	0.828	biological process	purine ribonucleotide metabolic process
atp6	GO:0098655	0.828	biological process	cation transmembrane transport
atp6	GO:0098660	0.828	biological process	inorganic ion transmembrane transport
atp6	GO:0015672	0.828	biological process	monovalent inorganic cation transport
atp6	GO:0009165	0.828	biological process	nucleotide biosynthetic process
atp6	GO:0009259	0.828	biological process	ribonucleotide metabolic process
atp6	GO:0006812	0.828	biological process	cation transport
atp6	GO:1901293	0.828	biological process	nucleoside phosphate biosynthetic process
atp6	GO:0009117	0.828	biological process	nucleotide metabolic process
atp6	GO:0034220	0.828	biological process	ion transmembrane transport
atp6	GO:0006163	0.828	biological process	purine nucleotide metabolic process
atp6	GO:0018130	0.828	biological process	heterocycle biosynthetic process
atp6	GO:1901362	0.828	biological process	organic cyclic compound biosynthetic process
atp6	GO:0006811	0.828	biological process	ion transport
atp6	GO:0090407	0.828	biological process	organophosphate biosynthetic process
atp6	GO:0044271	0.828	biological process	cellular nitrogen compound biosynthetic process
atp6	GO:0055085	0.828	biological process	transmembrane transport
atp6	GO:0019438	0.828	biological process	aromatic compound biosynthetic process
atp6	GO:0019693	0.828	biological process	ribose phosphate metabolic process
atp6	GO:0034654	0.828	biological process	nucleobase-containing compound biosynthetic process
atp6	GO:0006753	0.828	biological process	nucleoside phosphate metabolic process
atp6	GO:0072521	0.828	biological process	purine-containing compound metabolic process
atp6	GO:0006796	0.828	biological process	phosphate-containing compound metabolic process
atp6	GO:0006139	0.828	biological process	nucleobase-containing compound metabolic process
atp6	GO:0006793	0.828	biological process	phosphorus metabolic process
atp6	GO:0006725	0.828	biological process	cellular aromatic compound metabolic process
atp6	GO:1901360	0.828	biological process	organic cyclic compound metabolic process
atp6	GO:0046483	0.828	biological process	heterocycle metabolic process
atp6	GO:1901135	0.828	biological process	carbohydrate derivative metabolic process
atp6	GO:0055086	0.828	biological process	nucleobase-containing small molecule metabolic process
atp6	GO:1901564	0.828	biological process	organonitrogen compound metabolic process
atp6	GO:0044249	0.828	biological process	cellular biosynthetic process
atp6	GO:0019637	0.828	biological process	organophosphate metabolic process
atp6	GO:1901576	0.828	biological process	organic substance biosynthetic process
atp6	GO:0006810	0.828	biological process	transport
atp6	GO:0034641	0.828	biological process	cellular nitrogen compound metabolic process
atp6	GO:0071704	0.828	biological process	organic substance metabolic process
atp6	GO:0044281	0.828	biological process	small molecule metabolic process
atp6	GO:0044238	0.828	biological process	primary metabolic process
atp6	GO:0044237	0.828	biological process	cellular metabolic process
atp6	GO:0009058	0.828	biological process	biosynthetic process
atp6	GO:0006807	0.828	biological process	nitrogen compound metabolic process
atp6	GO:0051234	0.828	biological process	establishment of localization
atp6	GO:0051179	0.828	biological process	localization
atp6	GO:0009152	0.823	biological process	purine ribonucleotide biosynthetic process
atp6	GO:0006164	0.823	biological process	purine nucleotide biosynthetic process
atp6	GO:0009260	0.823	biological process	ribonucleotide biosynthetic process
atp6	GO:0009141	0.823	biological process	nucleoside triphosphate metabolic process
atp6	GO:0072522	0.823	biological process	purine-containing compound biosynthetic process
atp6	GO:0046390	0.823	biological process	ribose phosphate biosynthetic process
atp6	GO:1901137	0.823	biological process	carbohydrate derivative biosynthetic process
atp6	GO:1901566	0.823	biological process	organonitrogen compound biosynthetic process
atp6	GO:0046034	0.823	biological process	ATP metabolic process
atp6	GO:0016740	0.814	molecular function	transferase activity
atp6	GO:0008324	0.8	molecular function	cation transmembrane transporter activity
atp6	GO:0015075	0.8	molecular function	ion transmembrane transporter activity
atp6	GO:0017144	0.8	biological process	drug metabolic process
atp6	GO:0016020	0.8	cellular component	membrane
atp6	GO:0015318	0.793	molecular function	inorganic molecular entity transmembrane transporter activity
atp6	GO:0016772	0.793	molecular function	transferase activity, transferring phosphorus-containing groups
atp6	GO:0022890	0.79	molecular function	inorganic cation transmembrane transporter activity
atp6	GO:0005261	0.783	molecular function	cation channel activity
atp6	GO:0005216	0.783	molecular function	ion channel activity
atp6	GO:0015267	0.783	molecular function	channel activity
atp6	GO:0022803	0.783	molecular function	passive transmembrane transporter activity
atp6	GO:0009145	0.739	biological process	purine nucleoside triphosphate biosynthetic process
atp6	GO:0009206	0.739	biological process	purine ribonucleoside triphosphate biosynthetic process
atp6	GO:0009205	0.739	biological process	purine ribonucleoside triphosphate metabolic process
atp6	GO:0009201	0.739	biological process	ribonucleoside triphosphate biosynthetic process
atp6	GO:0015985	0.739	biological process	energy coupled proton transport, down electrochemical gradient
atp6	GO:0009142	0.739	biological process	nucleoside triphosphate biosynthetic process
atp6	GO:0009199	0.739	biological process	ribonucleoside triphosphate metabolic process
atp6	GO:0009144	0.739	biological process	purine nucleoside triphosphate metabolic process
atp6	GO:0015986	0.739	biological process	ATP synthesis coupled proton transport
atp6	GO:0006754	0.739	biological process	ATP biosynthetic process
atp6	GO:0016787	0.724	molecular function	hydrolase activity
atp6	GO:0015077	0.721	molecular function	monovalent inorganic cation transmembrane transporter activity
atp6	GO:0015252	0.7	molecular function	proton channel activity
atp6	GO:0016776	0.7	molecular function	phosphotransferase activity, phosphate group as acceptor
atp6	GO:0046933	0.7	molecular function	proton-transporting ATP synthase activity, rotational mechanism
atp6	GO:0015078	0.692	molecular function	proton transmembrane transporter activity
atp6	GO:0050896	0.682	biological process	response to stimulus
atp6	GO:0016462	0.677	molecular function	pyrophosphatase activity
atp6	GO:0016818	0.677	molecular function	hydrolase activity, acting on acid anhydrides, in phosphorus-containing anhydrides
atp6	GO:0016817	0.677	molecular function	hydrolase activity, acting on acid anhydrides
atp6	GO:0032991	0.649	cellular component	protein-containing complex
atp6	GO:0031967	0.627	cellular component	organelle envelope
atp6	GO:0031975	0.627	cellular component	envelope
atp6	GO:0009536	0.62	cellular component	plastid
atp8	GO:0003674	0.999	molecular function	molecular_function
atp8	GO:0005575	0.998	cellular component	cellular_component
atp8	GO:0110165	0.996	cellular component	cellular anatomical entity
atp8	GO:0005488	0.994	molecular function	binding
atp8	GO:0043227	0.991	cellular component	membrane-bounded organelle
atp8	GO:0043229	0.991	cellular component	intracellular organelle
atp8	GO:0043226	0.991	cellular component	organelle
atp8	GO:0005622	0.991	cellular component	intracellular
atp8	GO:0005737	0.99	cellular component	cytoplasm
atp8	GO:0043231	0.989	cellular component	intracellular membrane-bounded organelle
atp8	GO:0008150	0.988	biological process	biological_process
atp8	GO:0005515	0.949	molecular function	protein binding
atp8	GO:0005739	0.924	cellular component	mitochondrion
atp8	GO:0043167	0.877	molecular function	ion binding
atp8	GO:0046872	0.855	molecular function	metal ion binding
atp8	GO:0043169	0.855	molecular function	cation binding
atp8	GO:0016020	0.843	cellular component	membrane
atp8	GO:0046914	0.8	molecular function	transition metal ion binding
atp8	GO:0009987	0.738	biological process	cellular process
atp8	GO:0050897	0.726	molecular function	cobalt ion binding
atp8	GO:0031090	0.69	cellular component	organelle membrane
atp8	GO:0050896	0.664	biological process	response to stimulus
atp8	GO:0031975	0.627	cellular component	envelope
atp8	GO:0032991	0.625	cellular component	protein-containing complex
atp8	GO:0065007	0.615	biological process	biological regulation
atp8	GO:0031967	0.602	cellular component	organelle envelope
atp9	GO:0003674	0.999	molecular function	molecular_function
atp9	GO:0008150	0.998	biological process	biological_process
atp9	GO:0005575	0.998	cellular component	cellular_component
atp9	GO:0110165	0.996	cellular component	cellular anatomical entity
atp9	GO:0043226	0.99	cellular component	organelle
atp9	GO:0005622	0.99	cellular component	intracellular
atp9	GO:0043227	0.99	cellular component	membrane-bounded organelle
atp9	GO:0043229	0.99	cellular component	intracellular organelle
atp9	GO:0005737	0.988	cellular component	cytoplasm
atp9	GO:0043231	0.987	cellular component	intracellular membrane-bounded organelle
atp9	GO:0005488	0.966	molecular function	binding
atp9	GO:0005515	0.954	molecular function	protein binding
atp9	GO:0005739	0.937	cellular component	mitochondrion
atp9	GO:0016020	0.929	cellular component	membrane
atp9	GO:0009987	0.92	biological process	cellular process
atp9	GO:0022857	0.905	molecular function	transmembrane transporter activity
atp9	GO:0005215	0.905	molecular function	transporter activity
atp9	GO:0031090	0.891	cellular component	organelle membrane
atp9	GO:0032991	0.833	cellular component	protein-containing complex
atp9	GO:0003824	0.83	molecular function	catalytic activity
atp9	GO:0015267	0.826	molecular function	channel activity
atp9	GO:0022803	0.826	molecular function	passive transmembrane transporter activity
atp9	GO:0016043	0.815	biological process	cellular component organization
atp9	GO:0071840	0.815	biological process	cellular component organization or biogenesis
atp9	GO:0031967	0.814	cellular component	organelle envelope
atp9	GO:0031975	0.814	cellular component	envelope
atp9	GO:0050896	0.772	biological process	response to stimulus
atp9	GO:0031966	0.764	cellular component	mitochondrial membrane
atp9	GO:0005740	0.764	cellular component	mitochondrial envelope
atp9	GO:0008152	0.758	biological process	metabolic process
atp9	GO:0044237	0.749	biological process	cellular metabolic process
atp9	GO:0016787	0.746	molecular function	hydrolase activity
atp9	GO:0034220	0.735	biological process	ion transmembrane transport
atp9	GO:0006811	0.735	biological process	ion transport
atp9	GO:0055085	0.735	biological process	transmembrane transport
atp9	GO:0006810	0.735	biological process	transport
atp9	GO:0051234	0.735	biological process	establishment of localization
atp9	GO:0051179	0.735	biological process	localization
atp9	GO:0098796	0.727	cellular component	membrane protein complex
atp9	GO:0022836	0.721	molecular function	gated channel activity
atp9	GO:0034641	0.705	biological process	cellular nitrogen compound metabolic process
atp9	GO:0006807	0.705	biological process	nitrogen compound metabolic process
atp9	GO:0044238	0.704	biological process	primary metabolic process
atp9	GO:0044271	0.699	biological process	cellular nitrogen compound biosynthetic process
atp9	GO:0044249	0.699	biological process	cellular biosynthetic process
atp9	GO:0009058	0.699	biological process	biosynthetic process
atp9	GO:0019866	0.699	cellular component	organelle inner membrane
atp9	GO:0022834	0.697	molecular function	ligand-gated channel activity
atp9	GO:0016462	0.692	molecular function	pyrophosphatase activity
atp9	GO:0016818	0.692	molecular function	hydrolase activity, acting on acid anhydrides, in phosphorus-containing anhydrides
atp9	GO:0016817	0.692	molecular function	hydrolase activity, acting on acid anhydrides
atp9	GO:0009145	0.692	biological process	purine nucleoside triphosphate biosynthetic process
atp9	GO:0009152	0.692	biological process	purine ribonucleotide biosynthetic process
atp9	GO:0009206	0.692	biological process	purine ribonucleoside triphosphate biosynthetic process
atp9	GO:0009205	0.692	biological process	purine ribonucleoside triphosphate metabolic process
atp9	GO:0009201	0.692	biological process	ribonucleoside triphosphate biosynthetic process
atp9	GO:0009150	0.692	biological process	purine ribonucleotide metabolic process
atp9	GO:0009142	0.692	biological process	nucleoside triphosphate biosynthetic process
atp9	GO:0009199	0.692	biological process	ribonucleoside triphosphate metabolic process
atp9	GO:0006164	0.692	biological process	purine nucleotide biosynthetic process
atp9	GO:0009144	0.692	biological process	purine nucleoside triphosphate metabolic process
atp9	GO:0009260	0.692	biological process	ribonucleotide biosynthetic process
atp9	GO:0009165	0.692	biological process	nucleotide biosynthetic process
atp9	GO:0009259	0.692	biological process	ribonucleotide metabolic process
atp9	GO:1901293	0.692	biological process	nucleoside phosphate biosynthetic process
atp9	GO:0009117	0.692	biological process	nucleotide metabolic process
atp9	GO:0009141	0.692	biological process	nucleoside triphosphate metabolic process
atp9	GO:0072522	0.692	biological process	purine-containing compound biosynthetic process
atp9	GO:0006163	0.692	biological process	purine nucleotide metabolic process
atp9	GO:0046390	0.692	biological process	ribose phosphate biosynthetic process
atp9	GO:0018130	0.692	biological process	heterocycle biosynthetic process
atp9	GO:1901362	0.692	biological process	organic cyclic compound biosynthetic process
atp9	GO:0090407	0.692	biological process	organophosphate biosynthetic process
atp9	GO:1901137	0.692	biological process	carbohydrate derivative biosynthetic process
atp9	GO:1901566	0.692	biological process	organonitrogen compound biosynthetic process
atp9	GO:0019438	0.692	biological process	aromatic compound biosynthetic process
atp9	GO:0019693	0.692	biological process	ribose phosphate metabolic process
atp9	GO:0034654	0.692	biological process	nucleobase-containing compound biosynthetic process
atp9	GO:0006753	0.692	biological process	nucleoside phosphate metabolic process
atp9	GO:0072521	0.692	biological process	purine-containing compound metabolic process
atp9	GO:0006796	0.692	biological process	phosphate-containing compound metabolic process
atp9	GO:0006139	0.692	biological process	nucleobase-containing compound metabolic process
atp9	GO:0006793	0.692	biological process	phosphorus metabolic process
atp9	GO:0006725	0.692	biological process	cellular aromatic compound metabolic process
atp9	GO:1901360	0.692	biological process	organic cyclic compound metabolic process
atp9	GO:0046483	0.692	biological process	heterocycle metabolic process
atp9	GO:1901135	0.692	biological process	carbohydrate derivative metabolic process
atp9	GO:0055086	0.692	biological process	nucleobase-containing small molecule metabolic process
atp9	GO:1901564	0.692	biological process	organonitrogen compound metabolic process
atp9	GO:0006754	0.692	biological process	ATP biosynthetic process
atp9	GO:0017144	0.692	biological process	drug metabolic process
atp9	GO:0019637	0.692	biological process	organophosphate metabolic process
atp9	GO:1901576	0.692	biological process	organic substance biosynthetic process
atp9	GO:0046034	0.692	biological process	ATP metabolic process
atp9	GO:0071704	0.692	biological process	organic substance metabolic process
atp9	GO:0044281	0.692	biological process	small molecule metabolic process
atp9	GO:0005743	0.691	cellular component	mitochondrial inner membrane
atp9	GO:0098798	0.691	cellular component	mitochondrial protein complex
atp9	GO:0098662	0.684	biological process	inorganic cation transmembrane transport
atp9	GO:1902600	0.684	biological process	proton transmembrane transport
atp9	GO:0015985	0.684	biological process	energy coupled proton transport, down electrochemical gradient
atp9	GO:0098655	0.684	biological process	cation transmembrane transport
atp9	GO:0098660	0.684	biological process	inorganic ion transmembrane transport
atp9	GO:0015672	0.684	biological process	monovalent inorganic cation transport
atp9	GO:0006812	0.684	biological process	cation transport
atp9	GO:0015986	0.684	biological process	ATP synthesis coupled proton transport
atp9	GO:0098800	0.652	cellular component	inner mitochondrial membrane protein complex
atp9	GO:0016469	0.65	cellular component	proton-transporting two-sector ATPase complex
atp9	GO:0045259	0.65	cellular component	proton-transporting ATP synthase complex
atp9	GO:0009628	0.629	biological process	response to abiotic stimulus
atp9	GO:0005753	0.623	cellular component	mitochondrial proton-transporting ATP synthase complex
atp9	GO:0006996	0.619	biological process	organelle organization
atp9	GO:0007005	0.612	biological process	mitochondrion organization
atp9	GO:0016887	0.601	molecular function	ATPase activity
atp9	GO:0017111	0.601	molecular function	nucleoside-triphosphatase activity
ccmB	GO:0005488	0.987	molecular function	binding
ccmB	GO:0003674	0.987	molecular function	molecular_function
ccmB	GO:0005515	0.977	molecular function	protein binding
ccmB	GO:0005575	0.96	cellular component	cellular_component
ccmB	GO:0008150	0.954	biological process	biological_process
ccmB	GO:0110165	0.941	cellular component	cellular anatomical entity
ccmB	GO:0005622	0.867	cellular component	intracellular
ccmB	GO:0043231	0.849	cellular component	intracellular membrane-bounded organelle
ccmB	GO:0043227	0.849	cellular component	membrane-bounded organelle
ccmB	GO:0043229	0.849	cellular component	intracellular organelle
ccmB	GO:0043226	0.849	cellular component	organelle
ccmB	GO:0009987	0.848	biological process	cellular process
ccmB	GO:0005737	0.834	cellular component	cytoplasm
ccmB	GO:0065007	0.701	biological process	biological regulation
ccmB	GO:0005739	0.667	cellular component	mitochondrion
ccmB	GO:0050789	0.616	biological process	regulation of biological process
ccmC	GO:0003674	0.999	molecular function	molecular_function
ccmC	GO:0008150	0.998	biological process	biological_process
ccmC	GO:0005575	0.998	cellular component	cellular_component
ccmC	GO:0110165	0.997	cellular component	cellular anatomical entity
ccmC	GO:0005488	0.993	molecular function	binding
ccmC	GO:0043227	0.986	cellular component	membrane-bounded organelle
ccmC	GO:0043229	0.986	cellular component	intracellular organelle
ccmC	GO:0043226	0.986	cellular component	organelle
ccmC	GO:0005622	0.986	cellular component	intracellular
ccmC	GO:0043231	0.982	cellular component	intracellular membrane-bounded organelle
ccmC	GO:0005737	0.979	cellular component	cytoplasm
ccmC	GO:0005515	0.978	molecular function	protein binding
ccmC	GO:0009987	0.928	biological process	cellular process
ccmC	GO:0005739	0.888	cellular component	mitochondrion
ccmC	GO:0008152	0.859	biological process	metabolic process
ccmC	GO:0044237	0.853	biological process	cellular metabolic process
ccmC	GO:0003824	0.845	molecular function	catalytic activity
ccmC	GO:0044238	0.845	biological process	primary metabolic process
ccmC	GO:0071704	0.84	biological process	organic substance metabolic process
ccmC	GO:0006807	0.84	biological process	nitrogen compound metabolic process
ccmC	GO:1901564	0.84	biological process	organonitrogen compound metabolic process
ccmC	GO:0016020	0.749	cellular component	membrane
ccmC	GO:0051179	0.735	biological process	localization
ccmC	GO:0016491	0.722	molecular function	oxidoreductase activity
ccmC	GO:0043170	0.626	biological process	macromolecule metabolic process
ccmC	GO:0009536	0.619	cellular component	plastid
ccmFc	GO:0005575	0.998	cellular component	cellular_component
ccmFc	GO:0003674	0.997	molecular function	molecular_function
ccmFc	GO:0110165	0.997	cellular component	cellular anatomical entity
ccmFc	GO:0005488	0.996	molecular function	binding
ccmFc	GO:0005622	0.99	cellular component	intracellular
ccmFc	GO:0008150	0.988	biological process	biological_process
ccmFc	GO:0043227	0.988	cellular component	membrane-bounded organelle
ccmFc	GO:0043229	0.988	cellular component	intracellular organelle
ccmFc	GO:0043226	0.988	cellular component	organelle
ccmFc	GO:0005737	0.986	cellular component	cytoplasm
ccmFc	GO:0005515	0.985	molecular function	protein binding
ccmFc	GO:0043231	0.985	cellular component	intracellular membrane-bounded organelle
ccmFc	GO:0005739	0.916	cellular component	mitochondrion
ccmFc	GO:0009987	0.87	biological process	cellular process
ccmFc	GO:0008152	0.839	biological process	metabolic process
ccmFc	GO:0044237	0.824	biological process	cellular metabolic process
ccmFc	GO:0044238	0.757	biological process	primary metabolic process
ccmFc	GO:0016020	0.752	cellular component	membrane
ccmFc	GO:0071704	0.745	biological process	organic substance metabolic process
ccmFc	GO:0006807	0.735	biological process	nitrogen compound metabolic process
ccmFc	GO:0043170	0.719	biological process	macromolecule metabolic process
ccmFc	GO:0034641	0.665	biological process	cellular nitrogen compound metabolic process
ccmFc	GO:0016070	0.615	biological process	RNA metabolic process
ccmFc	GO:0090304	0.615	biological process	nucleic acid metabolic process
ccmFc	GO:0006139	0.615	biological process	nucleobase-containing compound metabolic process
ccmFc	GO:0006725	0.615	biological process	cellular aromatic compound metabolic process
ccmFc	GO:1901360	0.615	biological process	organic cyclic compound metabolic process
ccmFc	GO:0046483	0.615	biological process	heterocycle metabolic process
ccmFc	GO:0016043	0.611	biological process	cellular component organization
ccmFc	GO:0071840	0.611	biological process	cellular component organization or biogenesis
ccmFc	GO:1901363	0.609	molecular function	heterocyclic compound binding
ccmFc	GO:0097159	0.609	molecular function	organic cyclic compound binding
ccmFc	GO:0010467	0.606	biological process	gene expression
ccmFc	GO:0031090	0.603	cellular component	organelle membrane
ccmFn	GO:0003674	0.999	molecular function	molecular_function
ccmFn	GO:0008150	0.998	biological process	biological_process
ccmFn	GO:0005575	0.998	cellular component	cellular_component
ccmFn	GO:0110165	0.996	cellular component	cellular anatomical entity
ccmFn	GO:0005515	0.995	molecular function	protein binding
ccmFn	GO:0005488	0.995	molecular function	binding
ccmFn	GO:0005622	0.991	cellular component	intracellular
ccmFn	GO:0043227	0.99	cellular component	membrane-bounded organelle
ccmFn	GO:0043229	0.99	cellular component	intracellular organelle
ccmFn	GO:0043226	0.99	cellular component	organelle
ccmFn	GO:0005737	0.989	cellular component	cytoplasm
ccmFn	GO:0043231	0.988	cellular component	intracellular membrane-bounded organelle
ccmFn	GO:0005739	0.933	cellular component	mitochondrion
ccmFn	GO:0065003	0.898	biological process	protein-containing complex assembly
ccmFn	GO:0022607	0.898	biological process	cellular component assembly
ccmFn	GO:0043933	0.898	biological process	protein-containing complex subunit organization
ccmFn	GO:0016043	0.898	biological process	cellular component organization
ccmFn	GO:0044085	0.898	biological process	cellular component biogenesis
ccmFn	GO:0009987	0.898	biological process	cellular process
ccmFn	GO:0071840	0.898	biological process	cellular component organization or biogenesis
ccmFn	GO:0042221	0.733	biological process	response to chemical
ccmFn	GO:0050896	0.733	biological process	response to stimulus
ccmFn	GO:0010033	0.7	biological process	response to organic substance
ccmFn	GO:1901700	0.692	biological process	response to oxygen-containing compound
ccmFn	GO:0009719	0.679	biological process	response to endogenous stimulus
ccmFn	GO:0009725	0.664	biological process	response to hormone
ccmFn	GO:0034622	0.655	biological process	cellular protein-containing complex assembly
ccmFn	GO:0003824	0.642	molecular function	catalytic activity
ccmFn	GO:0008152	0.605	biological process	metabolic process
cob	GO:0003674	0.999	molecular function	molecular_function
cob	GO:0008150	0.998	biological process	biological_process
cob	GO:0005575	0.998	cellular component	cellular_component
cob	GO:0110165	0.997	cellular component	cellular anatomical entity
cob	GO:0005622	0.993	cellular component	intracellular
cob	GO:0043227	0.991	cellular component	membrane-bounded organelle
cob	GO:0043229	0.991	cellular component	intracellular organelle
cob	GO:0043226	0.991	cellular component	organelle
cob	GO:0005488	0.99	molecular function	binding
cob	GO:0005737	0.99	cellular component	cytoplasm
cob	GO:0043231	0.989	cellular component	intracellular membrane-bounded organelle
cob	GO:0005739	0.955	cellular component	mitochondrion
cob	GO:0005515	0.927	molecular function	protein binding
cob	GO:0016020	0.916	cellular component	membrane
cob	GO:0009987	0.89	biological process	cellular process
cob	GO:0003824	0.883	molecular function	catalytic activity
cob	GO:0008152	0.883	biological process	metabolic process
cob	GO:0016491	0.864	molecular function	oxidoreductase activity
cob	GO:1901363	0.848	molecular function	heterocyclic compound binding
cob	GO:0097159	0.848	molecular function	organic cyclic compound binding
cob	GO:0044237	0.844	biological process	cellular metabolic process
cob	GO:0009055	0.817	molecular function	electron transfer activity
cob	GO:0016679	0.817	molecular function	oxidoreductase activity, acting on diphenols and related substances as donors
cob	GO:0016681	0.817	molecular function	oxidoreductase activity, acting on diphenols and related substances as donors, cytochrome as acceptor
cob	GO:0008121	0.817	molecular function	ubiquinol-cytochrome-c reductase activity
cob	GO:0031090	0.799	cellular component	organelle membrane
cob	GO:0032991	0.774	cellular component	protein-containing complex
cob	GO:0031967	0.746	cellular component	organelle envelope
cob	GO:0031975	0.746	cellular component	envelope
cob	GO:0006091	0.742	biological process	generation of precursor metabolites and energy
cob	GO:0055114	0.742	biological process	oxidation-reduction process
cob	GO:0019866	0.718	cellular component	organelle inner membrane
cob	GO:0031966	0.718	cellular component	mitochondrial membrane
cob	GO:0005740	0.718	cellular component	mitochondrial envelope
cob	GO:0005743	0.71	cellular component	mitochondrial inner membrane
cob	GO:0098796	0.681	cellular component	membrane protein complex
cob	GO:1902494	0.678	cellular component	catalytic complex
cob	GO:0016310	0.67	biological process	phosphorylation
cob	GO:0006796	0.67	biological process	phosphate-containing compound metabolic process
cob	GO:0006793	0.67	biological process	phosphorus metabolic process
cob	GO:0050896	0.666	biological process	response to stimulus
cob	GO:0022900	0.661	biological process	electron transport chain
cob	GO:0046906	0.648	molecular function	tetrapyrrole binding
cob	GO:0048037	0.644	molecular function	cofactor binding
cob	GO:0020037	0.644	molecular function	heme binding
cob	GO:0003676	0.634	molecular function	nucleic acid binding
cob	GO:0042775	0.628	biological process	mitochondrial ATP synthesis coupled electron transport
cob	GO:0022904	0.628	biological process	respiratory electron transport chain
cob	GO:0042773	0.628	biological process	ATP synthesis coupled electron transport
cob	GO:0045333	0.628	biological process	cellular respiration
cob	GO:0006122	0.628	biological process	mitochondrial electron transport, ubiquinol to cytochrome c
cob	GO:0015980	0.628	biological process	energy derivation by oxidation of organic compounds
cob	GO:0006119	0.628	biological process	oxidative phosphorylation
cob	GO:0046034	0.628	biological process	ATP metabolic process
cob	GO:0098798	0.613	cellular component	mitochondrial protein complex
cob	GO:0006950	0.611	biological process	response to stress
cox1	GO:0003674	0.999	molecular function	molecular_function
cox1	GO:0008150	0.998	biological process	biological_process
cox1	GO:0005575	0.998	cellular component	cellular_component
cox1	GO:0110165	0.996	cellular component	cellular anatomical entity
cox1	GO:0005488	0.992	molecular function	binding
cox1	GO:0005622	0.991	cellular component	intracellular
cox1	GO:0043227	0.99	cellular component	membrane-bounded organelle
cox1	GO:0043229	0.99	cellular component	intracellular organelle
cox1	GO:0043226	0.99	cellular component	organelle
cox1	GO:0005737	0.988	cellular component	cytoplasm
cox1	GO:0043231	0.987	cellular component	intracellular membrane-bounded organelle
cox1	GO:0005739	0.965	cellular component	mitochondrion
cox1	GO:0005515	0.935	molecular function	protein binding
cox1	GO:0003824	0.921	molecular function	catalytic activity
cox1	GO:0016491	0.906	molecular function	oxidoreductase activity
cox1	GO:0022857	0.89	molecular function	transmembrane transporter activity
cox1	GO:0005215	0.89	molecular function	transporter activity
cox1	GO:0015002	0.862	molecular function	heme-copper terminal oxidase activity
cox1	GO:0008324	0.858	molecular function	cation transmembrane transporter activity
cox1	GO:0015075	0.858	molecular function	ion transmembrane transporter activity
cox1	GO:0015078	0.855	molecular function	proton transmembrane transporter activity
cox1	GO:0009055	0.855	molecular function	electron transfer activity
cox1	GO:0004129	0.855	molecular function	cytochrome-c oxidase activity
cox1	GO:0016676	0.855	molecular function	oxidoreductase activity, acting on a heme group of donors, oxygen as acceptor
cox1	GO:0016675	0.855	molecular function	oxidoreductase activity, acting on a heme group of donors
cox1	GO:0015318	0.853	molecular function	inorganic molecular entity transmembrane transporter activity
cox1	GO:0022890	0.851	molecular function	inorganic cation transmembrane transporter activity
cox1	GO:0016020	0.84	cellular component	membrane
cox1	GO:0015077	0.835	molecular function	monovalent inorganic cation transmembrane transporter activity
cox1	GO:0032991	0.792	cellular component	protein-containing complex
cox1	GO:0009987	0.79	biological process	cellular process
cox1	GO:0008152	0.789	biological process	metabolic process
cox1	GO:0055114	0.7	biological process	oxidation-reduction process
cox1	GO:0044237	0.699	biological process	cellular metabolic process
cox1	GO:0098796	0.657	cellular component	membrane protein complex
cox1	GO:0031975	0.652	cellular component	envelope
cox1	GO:0031967	0.627	cellular component	organelle envelope
cox1	GO:0031090	0.625	cellular component	organelle membrane
cox2	GO:0003674	0.999	molecular function	molecular_function
cox2	GO:0008150	0.998	biological process	biological_process
cox2	GO:0005575	0.998	cellular component	cellular_component
cox2	GO:0110165	0.997	cellular component	cellular anatomical entity
cox2	GO:0005488	0.992	molecular function	binding
cox2	GO:0005622	0.991	cellular component	intracellular
cox2	GO:0043227	0.99	cellular component	membrane-bounded organelle
cox2	GO:0043229	0.99	cellular component	intracellular organelle
cox2	GO:0043226	0.99	cellular component	organelle
cox2	GO:0005737	0.988	cellular component	cytoplasm
cox2	GO:0043231	0.987	cellular component	intracellular membrane-bounded organelle
cox2	GO:0005515	0.984	molecular function	protein binding
cox2	GO:0005739	0.949	cellular component	mitochondrion
cox2	GO:0003824	0.921	molecular function	catalytic activity
cox2	GO:0016491	0.899	molecular function	oxidoreductase activity
cox2	GO:0016020	0.881	cellular component	membrane
cox2	GO:0005215	0.875	molecular function	transporter activity
cox2	GO:0022857	0.869	molecular function	transmembrane transporter activity
cox2	GO:0015002	0.855	molecular function	heme-copper terminal oxidase activity
cox2	GO:0008324	0.841	molecular function	cation transmembrane transporter activity
cox2	GO:0015075	0.841	molecular function	ion transmembrane transporter activity
cox2	GO:0009055	0.839	molecular function	electron transfer activity
cox2	GO:0015318	0.835	molecular function	inorganic molecular entity transmembrane transporter activity
cox2	GO:0015078	0.826	molecular function	proton transmembrane transporter activity
cox2	GO:0015077	0.826	molecular function	monovalent inorganic cation transmembrane transporter activity
cox2	GO:0022890	0.826	molecular function	inorganic cation transmembrane transporter activity
cox2	GO:0004129	0.818	molecular function	cytochrome-c oxidase activity
cox2	GO:0016676	0.818	molecular function	oxidoreductase activity, acting on a heme group of donors, oxygen as acceptor
cox2	GO:0016675	0.818	molecular function	oxidoreductase activity, acting on a heme group of donors
cox2	GO:0009987	0.816	biological process	cellular process
cox2	GO:0008152	0.816	biological process	metabolic process
cox2	GO:0055114	0.755	biological process	oxidation-reduction process
cox2	GO:0006091	0.734	biological process	generation of precursor metabolites and energy
cox2	GO:0044237	0.734	biological process	cellular metabolic process
cox2	GO:0031090	0.701	cellular component	organelle membrane
cox2	GO:0032991	0.698	cellular component	protein-containing complex
cox2	GO:0031967	0.66	cellular component	organelle envelope
cox2	GO:0031975	0.66	cellular component	envelope
cox2	GO:0022900	0.646	biological process	electron transport chain
cox2	GO:0045333	0.626	biological process	cellular respiration
cox2	GO:0015980	0.626	biological process	energy derivation by oxidation of organic compounds
cox2	GO:0050789	0.621	biological process	regulation of biological process
cox2	GO:0065007	0.621	biological process	biological regulation
cox2	GO:0098796	0.604	cellular component	membrane protein complex
cox3	GO:0003674	0.999	molecular function	molecular_function
cox3	GO:0008150	0.998	biological process	biological_process
cox3	GO:0005575	0.998	cellular component	cellular_component
cox3	GO:0110165	0.997	cellular component	cellular anatomical entity
cox3	GO:0005622	0.991	cellular component	intracellular
cox3	GO:0043227	0.989	cellular component	membrane-bounded organelle
cox3	GO:0043229	0.989	cellular component	intracellular organelle
cox3	GO:0043226	0.989	cellular component	organelle
cox3	GO:0005737	0.988	cellular component	cytoplasm
cox3	GO:0043231	0.987	cellular component	intracellular membrane-bounded organelle
cox3	GO:0005488	0.982	molecular function	binding
cox3	GO:0005739	0.96	cellular component	mitochondrion
cox3	GO:0003824	0.948	molecular function	catalytic activity
cox3	GO:0022857	0.947	molecular function	transmembrane transporter activity
cox3	GO:0005215	0.947	molecular function	transporter activity
cox3	GO:0016491	0.937	molecular function	oxidoreductase activity
cox3	GO:0008324	0.935	molecular function	cation transmembrane transporter activity
cox3	GO:0015075	0.935	molecular function	ion transmembrane transporter activity
cox3	GO:0015077	0.933	molecular function	monovalent inorganic cation transmembrane transporter activity
cox3	GO:0022890	0.933	molecular function	inorganic cation transmembrane transporter activity
cox3	GO:0015318	0.933	molecular function	inorganic molecular entity transmembrane transporter activity
cox3	GO:0015002	0.924	molecular function	heme-copper terminal oxidase activity
cox3	GO:0009055	0.921	molecular function	electron transfer activity
cox3	GO:0005515	0.917	molecular function	protein binding
cox3	GO:0008152	0.917	biological process	metabolic process
cox3	GO:0009987	0.914	biological process	cellular process
cox3	GO:0015078	0.888	molecular function	proton transmembrane transporter activity
cox3	GO:0016020	0.881	cellular component	membrane
cox3	GO:0044237	0.876	biological process	cellular metabolic process
cox3	GO:0004129	0.858	molecular function	cytochrome-c oxidase activity
cox3	GO:0016676	0.858	molecular function	oxidoreductase activity, acting on a heme group of donors, oxygen as acceptor
cox3	GO:0016675	0.858	molecular function	oxidoreductase activity, acting on a heme group of donors
cox3	GO:0055114	0.856	biological process	oxidation-reduction process
cox3	GO:0016310	0.839	biological process	phosphorylation
cox3	GO:0006796	0.839	biological process	phosphate-containing compound metabolic process
cox3	GO:0006793	0.839	biological process	phosphorus metabolic process
cox3	GO:0006091	0.832	biological process	generation of precursor metabolites and energy
cox3	GO:0022900	0.832	biological process	electron transport chain
cox3	GO:0009060	0.82	biological process	aerobic respiration
cox3	GO:0006123	0.82	biological process	mitochondrial electron transport, cytochrome c to oxygen
cox3	GO:0042775	0.82	biological process	mitochondrial ATP synthesis coupled electron transport
cox3	GO:0019646	0.82	biological process	aerobic electron transport chain
cox3	GO:0022904	0.82	biological process	respiratory electron transport chain
cox3	GO:0042773	0.82	biological process	ATP synthesis coupled electron transport
cox3	GO:0045333	0.82	biological process	cellular respiration
cox3	GO:0015980	0.82	biological process	energy derivation by oxidation of organic compounds
cox3	GO:0006119	0.82	biological process	oxidative phosphorylation
cox3	GO:0046034	0.82	biological process	ATP metabolic process
cox3	GO:0032991	0.757	cellular component	protein-containing complex
cox3	GO:0031090	0.696	cellular component	organelle membrane
cox3	GO:0098796	0.677	cellular component	membrane protein complex
cox3	GO:0031967	0.652	cellular component	organelle envelope
cox3	GO:0031975	0.652	cellular component	envelope
matR	GO:0003674	0.999	molecular function	molecular_function
matR	GO:0008150	0.998	biological process	biological_process
matR	GO:0005575	0.998	cellular component	cellular_component
matR	GO:0110165	0.997	cellular component	cellular anatomical entity
matR	GO:0005488	0.993	molecular function	binding
matR	GO:0043226	0.993	cellular component	organelle
matR	GO:0043227	0.991	cellular component	membrane-bounded organelle
matR	GO:0043229	0.991	cellular component	intracellular organelle
matR	GO:0005622	0.991	cellular component	intracellular
matR	GO:0043231	0.991	cellular component	intracellular membrane-bounded organelle
matR	GO:0005737	0.989	cellular component	cytoplasm
matR	GO:0005515	0.964	molecular function	protein binding
matR	GO:0016740	0.946	molecular function	transferase activity
matR	GO:0003824	0.946	molecular function	catalytic activity
matR	GO:0009987	0.937	biological process	cellular process
matR	GO:0016772	0.919	molecular function	transferase activity, transferring phosphorus-containing groups
matR	GO:0005739	0.913	cellular component	mitochondrion
matR	GO:0016779	0.91	molecular function	nucleotidyltransferase activity
matR	GO:0090304	0.906	biological process	nucleic acid metabolic process
matR	GO:0006139	0.906	biological process	nucleobase-containing compound metabolic process
matR	GO:0006725	0.906	biological process	cellular aromatic compound metabolic process
matR	GO:1901360	0.906	biological process	organic cyclic compound metabolic process
matR	GO:0046483	0.906	biological process	heterocycle metabolic process
matR	GO:0043170	0.906	biological process	macromolecule metabolic process
matR	GO:0034641	0.906	biological process	cellular nitrogen compound metabolic process
matR	GO:0071704	0.906	biological process	organic substance metabolic process
matR	GO:0044238	0.906	biological process	primary metabolic process
matR	GO:0008152	0.906	biological process	metabolic process
matR	GO:0044237	0.899	biological process	cellular metabolic process
matR	GO:0006807	0.881	biological process	nitrogen compound metabolic process
matR	GO:0034061	0.843	molecular function	DNA polymerase activity
matR	GO:0140097	0.843	molecular function	catalytic activity, acting on DNA
matR	GO:0016070	0.756	biological process	RNA metabolic process
matR	GO:0010467	0.743	biological process	gene expression
matR	GO:0003964	0.731	molecular function	RNA-directed DNA polymerase activity
matR	GO:0006396	0.721	biological process	RNA processing
matR	GO:0000377	0.711	biological process	RNA splicing, via transesterification reactions with bulged adenosine as nucleophile
matR	GO:0000375	0.711	biological process	RNA splicing, via transesterification reactions
matR	GO:0008380	0.711	biological process	RNA splicing
matR	GO:0016043	0.673	biological process	cellular component organization
matR	GO:0071840	0.673	biological process	cellular component organization or biogenesis
matR	GO:0006996	0.659	biological process	organelle organization
matR	GO:0006397	0.653	biological process	mRNA processing
matR	GO:0016071	0.653	biological process	mRNA metabolic process
matR	GO:0000373	0.64	biological process	Group II intron splicing
matR	GO:0007005	0.635	biological process	mitochondrion organization
matR	GO:0044260	0.626	biological process	cellular macromolecule metabolic process
matR	GO:0065007	0.624	biological process	biological regulation
matR	GO:0006259	0.612	biological process	DNA metabolic process
mttB	GO:0003674	0.999	molecular function	molecular_function
mttB	GO:0008150	0.998	biological process	biological_process
mttB	GO:0005575	0.998	cellular component	cellular_component
mttB	GO:0110165	0.996	cellular component	cellular anatomical entity
mttB	GO:0005488	0.99	molecular function	binding
mttB	GO:0005515	0.987	molecular function	protein binding
mttB	GO:0005622	0.949	cellular component	intracellular
mttB	GO:0005737	0.926	cellular component	cytoplasm
mttB	GO:0043229	0.907	cellular component	intracellular organelle
mttB	GO:0043226	0.907	cellular component	organelle
mttB	GO:0043231	0.906	cellular component	intracellular membrane-bounded organelle
mttB	GO:0043227	0.906	cellular component	membrane-bounded organelle
mttB	GO:0050896	0.873	biological process	response to stimulus
mttB	GO:0009628	0.848	biological process	response to abiotic stimulus
mttB	GO:0009987	0.843	biological process	cellular process
mttB	GO:0022857	0.81	molecular function	transmembrane transporter activity
mttB	GO:0005215	0.81	molecular function	transporter activity
mttB	GO:0042802	0.773	molecular function	identical protein binding
mttB	GO:0016020	0.707	cellular component	membrane
mttB	GO:0009314	0.684	biological process	response to radiation
mttB	GO:0005739	0.661	cellular component	mitochondrion
mttB	GO:0022804	0.642	molecular function	active transmembrane transporter activity
mttB	GO:0008152	0.615	biological process	metabolic process
nad1	GO:0003674	0.999	molecular function	molecular_function
nad1	GO:0008150	0.998	biological process	biological_process
nad1	GO:0005575	0.998	cellular component	cellular_component
nad1	GO:0110165	0.996	cellular component	cellular anatomical entity
nad1	GO:0043227	0.99	cellular component	membrane-bounded organelle
nad1	GO:0043229	0.99	cellular component	intracellular organelle
nad1	GO:0043226	0.99	cellular component	organelle
nad1	GO:0005622	0.99	cellular component	intracellular
nad1	GO:0005737	0.988	cellular component	cytoplasm
nad1	GO:0043231	0.987	cellular component	intracellular membrane-bounded organelle
nad1	GO:0005488	0.986	molecular function	binding
nad1	GO:0005515	0.976	molecular function	protein binding
nad1	GO:0005739	0.904	cellular component	mitochondrion
nad1	GO:0009987	0.888	biological process	cellular process
nad1	GO:0044237	0.888	biological process	cellular metabolic process
nad1	GO:0008152	0.888	biological process	metabolic process
nad1	GO:0016020	0.881	cellular component	membrane
nad1	GO:0003824	0.846	molecular function	catalytic activity
nad1	GO:0032991	0.772	cellular component	protein-containing complex
nad1	GO:0016491	0.739	molecular function	oxidoreductase activity
nad1	GO:0031090	0.719	cellular component	organelle membrane
nad1	GO:0098796	0.688	cellular component	membrane protein complex
nad1	GO:1902494	0.685	cellular component	catalytic complex
nad1	GO:0043094	0.668	biological process	cellular metabolic compound salvage
nad1	GO:0009536	0.661	cellular component	plastid
nad1	GO:0016651	0.655	molecular function	oxidoreductase activity, acting on NAD(P)H
nad1	GO:0009853	0.655	biological process	photorespiration
nad1	GO:0003954	0.628	molecular function	NADH dehydrogenase activity
nad1	GO:0031967	0.626	cellular component	organelle envelope
nad1	GO:0031975	0.626	cellular component	envelope
nad1	GO:0050896	0.624	biological process	response to stimulus
nad1	GO:0006950	0.606	biological process	response to stress
nad2	GO:0003674	0.999	molecular function	molecular_function
nad2	GO:0008150	0.998	biological process	biological_process
nad2	GO:0005575	0.998	cellular component	cellular_component
nad2	GO:0110165	0.996	cellular component	cellular anatomical entity
nad2	GO:0043227	0.986	cellular component	membrane-bounded organelle
nad2	GO:0043229	0.986	cellular component	intracellular organelle
nad2	GO:0043226	0.986	cellular component	organelle
nad2	GO:0005622	0.986	cellular component	intracellular
nad2	GO:0005737	0.983	cellular component	cytoplasm
nad2	GO:0043231	0.982	cellular component	intracellular membrane-bounded organelle
nad2	GO:0005488	0.965	molecular function	binding
nad2	GO:0005739	0.933	cellular component	mitochondrion
nad2	GO:0005515	0.924	molecular function	protein binding
nad2	GO:0003824	0.878	molecular function	catalytic activity
nad2	GO:0006091	0.865	biological process	generation of precursor metabolites and energy
nad2	GO:0015980	0.865	biological process	energy derivation by oxidation of organic compounds
nad2	GO:0055114	0.865	biological process	oxidation-reduction process
nad2	GO:0008152	0.865	biological process	metabolic process
nad2	GO:0045333	0.845	biological process	cellular respiration
nad2	GO:0044237	0.842	biological process	cellular metabolic process
nad2	GO:0009987	0.842	biological process	cellular process
nad2	GO:0016491	0.823	molecular function	oxidoreductase activity
nad2	GO:0050896	0.811	biological process	response to stimulus
nad2	GO:0009060	0.802	biological process	aerobic respiration
nad2	GO:0009628	0.671	biological process	response to abiotic stimulus
nad2	GO:0003954	0.653	molecular function	NADH dehydrogenase activity
nad2	GO:0016651	0.653	molecular function	oxidoreductase activity, acting on NAD(P)H
nad2	GO:0006950	0.642	biological process	response to stress
nad2	GO:0065007	0.621	biological process	biological regulation
nad2	GO:0050789	0.616	biological process	regulation of biological process
nad2	GO:0016020	0.609	cellular component	membrane
nad3	GO:0003674	0.999	molecular function	molecular_function
nad3	GO:0008150	0.998	biological process	biological_process
nad3	GO:0005575	0.998	cellular component	cellular_component
nad3	GO:0110165	0.996	cellular component	cellular anatomical entity
nad3	GO:0043227	0.99	cellular component	membrane-bounded organelle
nad3	GO:0043229	0.99	cellular component	intracellular organelle
nad3	GO:0043226	0.99	cellular component	organelle
nad3	GO:0005622	0.99	cellular component	intracellular
nad3	GO:0005737	0.989	cellular component	cytoplasm
nad3	GO:0043231	0.988	cellular component	intracellular membrane-bounded organelle
nad3	GO:0005488	0.981	molecular function	binding
nad3	GO:0003824	0.949	molecular function	catalytic activity
nad3	GO:0009987	0.937	biological process	cellular process
nad3	GO:0005515	0.936	molecular function	protein binding
nad3	GO:0016491	0.92	molecular function	oxidoreductase activity
nad3	GO:0005739	0.895	cellular component	mitochondrion
nad3	GO:0016020	0.876	cellular component	membrane
nad3	GO:0008152	0.847	biological process	metabolic process
nad3	GO:0044237	0.833	biological process	cellular metabolic process
nad3	GO:0009536	0.772	cellular component	plastid
nad3	GO:0016651	0.767	molecular function	oxidoreductase activity, acting on NAD(P)H
nad3	GO:0032991	0.766	cellular component	protein-containing complex
nad3	GO:0003954	0.754	molecular function	NADH dehydrogenase activity
nad3	GO:0050896	0.696	biological process	response to stimulus
nad3	GO:0031090	0.684	cellular component	organelle membrane
nad3	GO:0098796	0.655	cellular component	membrane protein complex
nad3	GO:1902494	0.652	cellular component	catalytic complex
nad3	GO:0042221	0.641	biological process	response to chemical
nad3	GO:0070887	0.635	biological process	cellular response to chemical stimulus
nad3	GO:0051716	0.635	biological process	cellular response to stimulus
nad3	GO:0010038	0.609	biological process	response to metal ion
nad3	GO:0010035	0.609	biological process	response to inorganic substance
nad4	GO:0003674	0.999	molecular function	molecular_function
nad4	GO:0008150	0.998	biological process	biological_process
nad4	GO:0005575	0.998	cellular component	cellular_component
nad4	GO:0110165	0.996	cellular component	cellular anatomical entity
nad4	GO:0043226	0.989	cellular component	organelle
nad4	GO:0005622	0.989	cellular component	intracellular
nad4	GO:0043229	0.988	cellular component	intracellular organelle
nad4	GO:0043227	0.986	cellular component	membrane-bounded organelle
nad4	GO:0005737	0.983	cellular component	cytoplasm
nad4	GO:0005488	0.982	molecular function	binding
nad4	GO:0043231	0.982	cellular component	intracellular membrane-bounded organelle
nad4	GO:0005515	0.962	molecular function	protein binding
nad4	GO:0005739	0.901	cellular component	mitochondrion
nad4	GO:0009987	0.89	biological process	cellular process
nad4	GO:0003824	0.862	molecular function	catalytic activity
nad4	GO:0008152	0.85	biological process	metabolic process
nad4	GO:0044237	0.836	biological process	cellular metabolic process
nad4	GO:0016020	0.807	cellular component	membrane
nad4	GO:0016491	0.756	molecular function	oxidoreductase activity
nad4	GO:0032991	0.755	cellular component	protein-containing complex
nad4	GO:0031090	0.707	cellular component	organelle membrane
nad4	GO:0016651	0.703	molecular function	oxidoreductase activity, acting on NAD(P)H
nad4	GO:0098796	0.681	cellular component	membrane protein complex
nad4	GO:1902494	0.678	cellular component	catalytic complex
nad4	GO:0003954	0.661	molecular function	NADH dehydrogenase activity
nad4	GO:0031967	0.652	cellular component	organelle envelope
nad4	GO:0031975	0.652	cellular component	envelope
nad4	GO:0009536	0.642	cellular component	plastid
nad4	GO:0050896	0.632	biological process	response to stimulus
nad4	GO:0005215	0.608	molecular function	transporter activity
nad4L	GO:0003674	0.999	molecular function	molecular_function
nad4L	GO:0005575	0.998	cellular component	cellular_component
nad4L	GO:0110165	0.997	cellular component	cellular anatomical entity
nad4L	GO:0005622	0.99	cellular component	intracellular
nad4L	GO:0043229	0.99	cellular component	intracellular organelle
nad4L	GO:0043226	0.99	cellular component	organelle
nad4L	GO:0005488	0.988	molecular function	binding
nad4L	GO:0008150	0.988	biological process	biological_process
nad4L	GO:0005737	0.988	cellular component	cytoplasm
nad4L	GO:0005515	0.983	molecular function	protein binding
nad4L	GO:0043227	0.977	cellular component	membrane-bounded organelle
nad4L	GO:0043231	0.977	cellular component	intracellular membrane-bounded organelle
nad4L	GO:0003824	0.937	molecular function	catalytic activity
nad4L	GO:0005739	0.902	cellular component	mitochondrion
nad4L	GO:0016491	0.874	molecular function	oxidoreductase activity
nad4L	GO:0009987	0.87	biological process	cellular process
nad4L	GO:0016651	0.775	molecular function	oxidoreductase activity, acting on NAD(P)H
nad4L	GO:0050896	0.763	biological process	response to stimulus
nad4L	GO:0008152	0.709	biological process	metabolic process
nad4L	GO:0006950	0.695	biological process	response to stress
nad4L	GO:0044237	0.675	biological process	cellular metabolic process
nad4L	GO:0009628	0.663	biological process	response to abiotic stimulus
nad4L	GO:0003954	0.614	molecular function	NADH dehydrogenase activity
nad4L	GO:0008137	0.609	molecular function	NADH dehydrogenase (ubiquinone) activity
nad4L	GO:0050136	0.609	molecular function	NADH dehydrogenase (quinone) activity
nad4L	GO:0016655	0.609	molecular function	oxidoreductase activity, acting on NAD(P)H, quinone or similar compound as acceptor
nad4L	GO:0043232	0.605	cellular component	intracellular non-membrane-bounded organelle
nad4L	GO:0043228	0.605	cellular component	non-membrane-bounded organelle
nad4L	GO:0071840	0.603	biological process	cellular component organization or biogenesis
nad6	GO:0003674	0.999	molecular function	molecular_function
nad6	GO:0005575	0.998	cellular component	cellular_component
nad6	GO:0110165	0.996	cellular component	cellular anatomical entity
nad6	GO:0005622	0.99	cellular component	intracellular
nad6	GO:0043227	0.99	cellular component	membrane-bounded organelle
nad6	GO:0043229	0.99	cellular component	intracellular organelle
nad6	GO:0043226	0.99	cellular component	organelle
nad6	GO:0008150	0.988	biological process	biological_process
nad6	GO:0005737	0.988	cellular component	cytoplasm
nad6	GO:0043231	0.987	cellular component	intracellular membrane-bounded organelle
nad6	GO:0005488	0.98	molecular function	binding
nad6	GO:0005515	0.949	molecular function	protein binding
nad6	GO:0003824	0.924	molecular function	catalytic activity
nad6	GO:0005739	0.882	cellular component	mitochondrion
nad6	GO:0009987	0.87	biological process	cellular process
nad6	GO:0008152	0.862	biological process	metabolic process
nad6	GO:0044237	0.848	biological process	cellular metabolic process
nad6	GO:0016491	0.842	molecular function	oxidoreductase activity
nad6	GO:0016651	0.717	molecular function	oxidoreductase activity, acting on NAD(P)H
nad6	GO:0016020	0.653	cellular component	membrane
nad6	GO:0009536	0.637	cellular component	plastid
nad6	GO:0008137	0.609	molecular function	NADH dehydrogenase (ubiquinone) activity
nad6	GO:0050136	0.609	molecular function	NADH dehydrogenase (quinone) activity
nad6	GO:0016655	0.609	molecular function	oxidoreductase activity, acting on NAD(P)H, quinone or similar compound as acceptor
nad6	GO:0003954	0.609	molecular function	NADH dehydrogenase activity
nad7	GO:0003674	0.999	molecular function	molecular_function
nad7	GO:0008150	0.998	biological process	biological_process
nad7	GO:0005575	0.998	cellular component	cellular_component
nad7	GO:0110165	0.997	cellular component	cellular anatomical entity
nad7	GO:0043227	0.989	cellular component	membrane-bounded organelle
nad7	GO:0043229	0.989	cellular component	intracellular organelle
nad7	GO:0043226	0.989	cellular component	organelle
nad7	GO:0005622	0.989	cellular component	intracellular
nad7	GO:0005488	0.988	molecular function	binding
nad7	GO:0043231	0.987	cellular component	intracellular membrane-bounded organelle
nad7	GO:0005515	0.984	molecular function	protein binding
nad7	GO:0005737	0.974	cellular component	cytoplasm
nad7	GO:0050896	0.922	biological process	response to stimulus
nad7	GO:0003824	0.905	molecular function	catalytic activity
nad7	GO:0005739	0.884	cellular component	mitochondrion
nad7	GO:0006950	0.878	biological process	response to stress
nad7	GO:0045333	0.864	biological process	cellular respiration
nad7	GO:0006091	0.864	biological process	generation of precursor metabolites and energy
nad7	GO:0015980	0.864	biological process	energy derivation by oxidation of organic compounds
nad7	GO:0055114	0.864	biological process	oxidation-reduction process
nad7	GO:0008152	0.864	biological process	metabolic process
nad7	GO:0016491	0.85	molecular function	oxidoreductase activity
nad7	GO:0044237	0.849	biological process	cellular metabolic process
nad7	GO:0009987	0.849	biological process	cellular process
nad7	GO:0016651	0.708	molecular function	oxidoreductase activity, acting on NAD(P)H
nad7	GO:0016020	0.687	cellular component	membrane
nad7	GO:0009536	0.675	cellular component	plastid
nad7	GO:0003954	0.653	molecular function	NADH dehydrogenase activity
nad7	GO:0006979	0.621	biological process	response to oxidative stress
nad7	GO:0019899	0.616	molecular function	enzyme binding
nad7	GO:0009628	0.612	biological process	response to abiotic stimulus
nad7	GO:0016310	0.608	biological process	phosphorylation
nad7	GO:0006796	0.608	biological process	phosphate-containing compound metabolic process
nad7	GO:0006793	0.608	biological process	phosphorus metabolic process
nad7	GO:0022900	0.601	biological process	electron transport chain
nad7	GO:0046034	0.601	biological process	ATP metabolic process
nad9	GO:0003674	0.999	molecular function	molecular_function
nad9	GO:0005488	0.998	molecular function	binding
nad9	GO:0008150	0.998	biological process	biological_process
nad9	GO:0005575	0.998	cellular component	cellular_component
nad9	GO:0110165	0.997	cellular component	cellular anatomical entity
nad9	GO:0005515	0.991	molecular function	protein binding
nad9	GO:0043227	0.99	cellular component	membrane-bounded organelle
nad9	GO:0043229	0.99	cellular component	intracellular organelle
nad9	GO:0043226	0.99	cellular component	organelle
nad9	GO:0005622	0.99	cellular component	intracellular
nad9	GO:0005737	0.988	cellular component	cytoplasm
nad9	GO:0043231	0.987	cellular component	intracellular membrane-bounded organelle
nad9	GO:0005739	0.944	cellular component	mitochondrion
nad9	GO:0009987	0.928	biological process	cellular process
nad9	GO:0044237	0.915	biological process	cellular metabolic process
nad9	GO:0008152	0.915	biological process	metabolic process
nad9	GO:0016020	0.9	cellular component	membrane
nad9	GO:0003824	0.886	molecular function	catalytic activity
nad9	GO:0032991	0.852	cellular component	protein-containing complex
nad9	GO:0031090	0.814	cellular component	organelle membrane
nad9	GO:0016491	0.782	molecular function	oxidoreductase activity
nad9	GO:0055114	0.731	biological process	oxidation-reduction process
nad9	GO:0098796	0.727	cellular component	membrane protein complex
nad9	GO:0031967	0.725	cellular component	organelle envelope
nad9	GO:0031975	0.725	cellular component	envelope
nad9	GO:0016651	0.712	molecular function	oxidoreductase activity, acting on NAD(P)H
nad9	GO:0003954	0.709	molecular function	NADH dehydrogenase activity
nad9	GO:0050789	0.68	biological process	regulation of biological process
nad9	GO:0065007	0.68	biological process	biological regulation
nad9	GO:0006091	0.662	biological process	generation of precursor metabolites and energy
nad9	GO:0050794	0.64	biological process	regulation of cellular process
nad9	GO:0045333	0.619	biological process	cellular respiration
nad9	GO:0015980	0.619	biological process	energy derivation by oxidation of organic compounds
nad9	GO:0022900	0.615	biological process	electron transport chain
nad9	GO:0016310	0.614	biological process	phosphorylation
nad9	GO:0006796	0.614	biological process	phosphate-containing compound metabolic process
nad9	GO:0006793	0.614	biological process	phosphorus metabolic process
nad9	GO:1902494	0.611	cellular component	catalytic complex
ORF671	GO:0005575	0.998	cellular component	cellular_component
ORF671	GO:0003674	0.997	molecular function	molecular_function
ORF671	GO:0110165	0.997	cellular component	cellular anatomical entity
ORF671	GO:0005488	0.994	molecular function	binding
ORF671	GO:0005622	0.99	cellular component	intracellular
ORF671	GO:0008150	0.988	biological process	biological_process
ORF671	GO:0005515	0.986	molecular function	protein binding
ORF671	GO:0043229	0.97	cellular component	intracellular organelle
ORF671	GO:0043226	0.97	cellular component	organelle
ORF671	GO:0043227	0.968	cellular component	membrane-bounded organelle
ORF671	GO:0043231	0.968	cellular component	intracellular membrane-bounded organelle
ORF671	GO:0005737	0.914	cellular component	cytoplasm
ORF671	GO:0065007	0.857	biological process	biological regulation
ORF671	GO:0050789	0.848	biological process	regulation of biological process
ORF671	GO:0009987	0.828	biological process	cellular process
ORF671	GO:0050794	0.777	biological process	regulation of cellular process
ORF671	GO:0005739	0.755	cellular component	mitochondrion
ORF671	GO:0016020	0.693	cellular component	membrane
ORF671	GO:0005634	0.678	cellular component	nucleus
ORF671	GO:0008152	0.606	biological process	metabolic process
ORF671	GO:0060255	0.603	biological process	regulation of macromolecule metabolic process
ORF671	GO:0031323	0.603	biological process	regulation of cellular metabolic process
ORF671	GO:0019222	0.603	biological process	regulation of metabolic process
rpl10	GO:0005488	0.987	molecular function	binding
rpl10	GO:0003674	0.987	molecular function	molecular_function
rpl10	GO:0005515	0.977	molecular function	protein binding
rpl10	GO:0005575	0.96	cellular component	cellular_component
rpl10	GO:0008150	0.954	biological process	biological_process
rpl10	GO:0110165	0.947	cellular component	cellular anatomical entity
rpl10	GO:0005622	0.867	cellular component	intracellular
rpl10	GO:0043231	0.849	cellular component	intracellular membrane-bounded organelle
rpl10	GO:0043227	0.849	cellular component	membrane-bounded organelle
rpl10	GO:0043229	0.849	cellular component	intracellular organelle
rpl10	GO:0043226	0.849	cellular component	organelle
rpl10	GO:0009987	0.848	biological process	cellular process
rpl10	GO:0005737	0.834	cellular component	cytoplasm
rpl10	GO:0065007	0.684	biological process	biological regulation
rpl10	GO:0005739	0.667	cellular component	mitochondrion
rpl10	GO:0050789	0.616	biological process	regulation of biological process
rpl16	GO:0003674	0.999	molecular function	molecular_function
rpl16	GO:0008150	0.998	biological process	biological_process
rpl16	GO:0005575	0.998	cellular component	cellular_component
rpl16	GO:0110165	0.997	cellular component	cellular anatomical entity
rpl16	GO:0005622	0.993	cellular component	intracellular
rpl16	GO:0043229	0.993	cellular component	intracellular organelle
rpl16	GO:0043226	0.993	cellular component	organelle
rpl16	GO:0005737	0.992	cellular component	cytoplasm
rpl16	GO:0043227	0.99	cellular component	membrane-bounded organelle
rpl16	GO:0043231	0.988	cellular component	intracellular membrane-bounded organelle
rpl16	GO:0005488	0.983	molecular function	binding
rpl16	GO:0009987	0.937	biological process	cellular process
rpl16	GO:0005515	0.932	molecular function	protein binding
rpl16	GO:0005198	0.931	molecular function	structural molecule activity
rpl16	GO:0003735	0.931	molecular function	structural constituent of ribosome
rpl16	GO:0003676	0.875	molecular function	nucleic acid binding
rpl16	GO:1901363	0.875	molecular function	heterocyclic compound binding
rpl16	GO:0097159	0.875	molecular function	organic cyclic compound binding
rpl16	GO:0044271	0.821	biological process	cellular nitrogen compound biosynthetic process
rpl16	GO:0009059	0.821	biological process	macromolecule biosynthetic process
rpl16	GO:0034645	0.821	biological process	cellular macromolecule biosynthetic process
rpl16	GO:0043170	0.821	biological process	macromolecule metabolic process
rpl16	GO:0044249	0.821	biological process	cellular biosynthetic process
rpl16	GO:1901576	0.821	biological process	organic substance biosynthetic process
rpl16	GO:0034641	0.821	biological process	cellular nitrogen compound metabolic process
rpl16	GO:0044260	0.821	biological process	cellular macromolecule metabolic process
rpl16	GO:0071704	0.821	biological process	organic substance metabolic process
rpl16	GO:0044237	0.821	biological process	cellular metabolic process
rpl16	GO:0009058	0.821	biological process	biosynthetic process
rpl16	GO:0006807	0.821	biological process	nitrogen compound metabolic process
rpl16	GO:0008152	0.821	biological process	metabolic process
rpl16	GO:0009536	0.821	cellular component	plastid
rpl16	GO:0010467	0.811	biological process	gene expression
rpl16	GO:0006412	0.794	biological process	translation
rpl16	GO:0043043	0.794	biological process	peptide biosynthetic process
rpl16	GO:0043604	0.794	biological process	amide biosynthetic process
rpl16	GO:1901566	0.794	biological process	organonitrogen compound biosynthetic process
rpl16	GO:0043603	0.794	biological process	cellular amide metabolic process
rpl16	GO:0044267	0.794	biological process	cellular protein metabolic process
rpl16	GO:0006518	0.794	biological process	peptide metabolic process
rpl16	GO:0019538	0.794	biological process	protein metabolic process
rpl16	GO:1901564	0.794	biological process	organonitrogen compound metabolic process
rpl16	GO:0044238	0.794	biological process	primary metabolic process
rpl16	GO:0003723	0.792	molecular function	RNA binding
rpl16	GO:0005739	0.754	cellular component	mitochondrion
rpl16	GO:0019843	0.749	molecular function	rRNA binding
rpl16	GO:0000049	0.734	molecular function	tRNA binding
rpl16	GO:0043232	0.702	cellular component	intracellular non-membrane-bounded organelle
rpl16	GO:0043228	0.702	cellular component	non-membrane-bounded organelle
rpl16	GO:0043933	0.608	biological process	protein-containing complex subunit organization
rpl16	GO:0016043	0.608	biological process	cellular component organization
rpl16	GO:0071840	0.608	biological process	cellular component organization or biogenesis
rpl2	GO:0003674	0.999	molecular function	molecular_function
rpl2	GO:0008150	0.998	biological process	biological_process
rpl2	GO:0005575	0.998	cellular component	cellular_component
rpl2	GO:0110165	0.996	cellular component	cellular anatomical entity
rpl2	GO:0005622	0.993	cellular component	intracellular
rpl2	GO:0043229	0.991	cellular component	intracellular organelle
rpl2	GO:0043226	0.991	cellular component	organelle
rpl2	GO:0005488	0.989	molecular function	binding
rpl2	GO:0005737	0.984	cellular component	cytoplasm
rpl2	GO:0043227	0.975	cellular component	membrane-bounded organelle
rpl2	GO:0043231	0.975	cellular component	intracellular membrane-bounded organelle
rpl2	GO:0005515	0.953	molecular function	protein binding
rpl2	GO:0009987	0.928	biological process	cellular process
rpl2	GO:1901363	0.872	molecular function	heterocyclic compound binding
rpl2	GO:0097159	0.872	molecular function	organic cyclic compound binding
rpl2	GO:0003676	0.869	molecular function	nucleic acid binding
rpl2	GO:0006412	0.823	biological process	translation
rpl2	GO:0043043	0.823	biological process	peptide biosynthetic process
rpl2	GO:0043604	0.823	biological process	amide biosynthetic process
rpl2	GO:1901566	0.823	biological process	organonitrogen compound biosynthetic process
rpl2	GO:0009059	0.823	biological process	macromolecule biosynthetic process
rpl2	GO:0010467	0.823	biological process	gene expression
rpl2	GO:0043603	0.823	biological process	cellular amide metabolic process
rpl2	GO:0044267	0.823	biological process	cellular protein metabolic process
rpl2	GO:0006518	0.823	biological process	peptide metabolic process
rpl2	GO:0034645	0.823	biological process	cellular macromolecule biosynthetic process
rpl2	GO:0019538	0.823	biological process	protein metabolic process
rpl2	GO:1901564	0.823	biological process	organonitrogen compound metabolic process
rpl2	GO:0043170	0.823	biological process	macromolecule metabolic process
rpl2	GO:0044249	0.823	biological process	cellular biosynthetic process
rpl2	GO:1901576	0.823	biological process	organic substance biosynthetic process
rpl2	GO:0034641	0.823	biological process	cellular nitrogen compound metabolic process
rpl2	GO:0044260	0.823	biological process	cellular macromolecule metabolic process
rpl2	GO:0071704	0.823	biological process	organic substance metabolic process
rpl2	GO:0044238	0.823	biological process	primary metabolic process
rpl2	GO:0044237	0.823	biological process	cellular metabolic process
rpl2	GO:0009058	0.823	biological process	biosynthetic process
rpl2	GO:0006807	0.823	biological process	nitrogen compound metabolic process
rpl2	GO:0008152	0.823	biological process	metabolic process
rpl2	GO:0043232	0.818	cellular component	intracellular non-membrane-bounded organelle
rpl2	GO:0043228	0.818	cellular component	non-membrane-bounded organelle
rpl2	GO:0044271	0.811	biological process	cellular nitrogen compound biosynthetic process
rpl2	GO:0032991	0.792	cellular component	protein-containing complex
rpl2	GO:0003723	0.776	molecular function	RNA binding
rpl2	GO:0005739	0.764	cellular component	mitochondrion
rpl2	GO:0003729	0.757	molecular function	mRNA binding
rpl2	GO:0070013	0.721	cellular component	intracellular organelle lumen
rpl2	GO:0043233	0.721	cellular component	organelle lumen
rpl2	GO:0031974	0.721	cellular component	membrane-enclosed lumen
rpl2	GO:0005198	0.664	molecular function	structural molecule activity
rpl2	GO:0003735	0.664	molecular function	structural constituent of ribosome
rpl2	GO:1990904	0.622	cellular component	ribonucleoprotein complex
rpl2	GO:0050789	0.616	biological process	regulation of biological process
rpl2	GO:0065007	0.616	biological process	biological regulation
rpl5	GO:0003674	0.999	molecular function	molecular_function
rpl5	GO:0008150	0.998	biological process	biological_process
rpl5	GO:0005575	0.998	cellular component	cellular_component
rpl5	GO:0110165	0.997	cellular component	cellular anatomical entity
rpl5	GO:0043229	0.991	cellular component	intracellular organelle
rpl5	GO:0043226	0.991	cellular component	organelle
rpl5	GO:0005622	0.991	cellular component	intracellular
rpl5	GO:0005488	0.99	molecular function	binding
rpl5	GO:0005737	0.99	cellular component	cytoplasm
rpl5	GO:0005515	0.975	molecular function	protein binding
rpl5	GO:0043231	0.929	cellular component	intracellular membrane-bounded organelle
rpl5	GO:0043227	0.929	cellular component	membrane-bounded organelle
rpl5	GO:0009987	0.917	biological process	cellular process
rpl5	GO:0006412	0.887	biological process	translation
rpl5	GO:0043043	0.887	biological process	peptide biosynthetic process
rpl5	GO:0043604	0.887	biological process	amide biosynthetic process
rpl5	GO:1901566	0.887	biological process	organonitrogen compound biosynthetic process
rpl5	GO:0009059	0.887	biological process	macromolecule biosynthetic process
rpl5	GO:0010467	0.887	biological process	gene expression
rpl5	GO:0043603	0.887	biological process	cellular amide metabolic process
rpl5	GO:0044267	0.887	biological process	cellular protein metabolic process
rpl5	GO:0006518	0.887	biological process	peptide metabolic process
rpl5	GO:0034645	0.887	biological process	cellular macromolecule biosynthetic process
rpl5	GO:0019538	0.887	biological process	protein metabolic process
rpl5	GO:1901564	0.887	biological process	organonitrogen compound metabolic process
rpl5	GO:0043170	0.887	biological process	macromolecule metabolic process
rpl5	GO:0044249	0.887	biological process	cellular biosynthetic process
rpl5	GO:1901576	0.887	biological process	organic substance biosynthetic process
rpl5	GO:0034641	0.887	biological process	cellular nitrogen compound metabolic process
rpl5	GO:0044260	0.887	biological process	cellular macromolecule metabolic process
rpl5	GO:0071704	0.887	biological process	organic substance metabolic process
rpl5	GO:0044238	0.887	biological process	primary metabolic process
rpl5	GO:0044237	0.887	biological process	cellular metabolic process
rpl5	GO:0009058	0.887	biological process	biosynthetic process
rpl5	GO:0006807	0.887	biological process	nitrogen compound metabolic process
rpl5	GO:0008152	0.887	biological process	metabolic process
rpl5	GO:1901363	0.879	molecular function	heterocyclic compound binding
rpl5	GO:0097159	0.879	molecular function	organic cyclic compound binding
rpl5	GO:0043232	0.874	cellular component	intracellular non-membrane-bounded organelle
rpl5	GO:0043228	0.874	cellular component	non-membrane-bounded organelle
rpl5	GO:0044271	0.873	biological process	cellular nitrogen compound biosynthetic process
rpl5	GO:0003676	0.872	molecular function	nucleic acid binding
rpl5	GO:0032991	0.867	cellular component	protein-containing complex
rpl5	GO:0005829	0.86	cellular component	cytosol
rpl5	GO:0003723	0.782	molecular function	RNA binding
rpl5	GO:0005739	0.705	cellular component	mitochondrion
rpl5	GO:1990904	0.668	cellular component	ribonucleoprotein complex
rpl5	GO:0008097	0.609	molecular function	5S rRNA binding
rpl5	GO:0019843	0.609	molecular function	rRNA binding
rpl5	GO:0005634	0.606	cellular component	nucleus
rps1	GO:0005575	0.998	cellular component	cellular_component
rps1	GO:0003674	0.997	molecular function	molecular_function
rps1	GO:0110165	0.997	cellular component	cellular anatomical entity
rps1	GO:0005488	0.993	molecular function	binding
rps1	GO:0008150	0.988	biological process	biological_process
rps1	GO:0043226	0.987	cellular component	organelle
rps1	GO:0005622	0.987	cellular component	intracellular
rps1	GO:0005515	0.985	molecular function	protein binding
rps1	GO:0043229	0.984	cellular component	intracellular organelle
rps1	GO:0005737	0.981	cellular component	cytoplasm
rps1	GO:0009987	0.87	biological process	cellular process
rps1	GO:0043231	0.849	cellular component	intracellular membrane-bounded organelle
rps1	GO:0043227	0.849	cellular component	membrane-bounded organelle
rps1	GO:0043232	0.803	cellular component	intracellular non-membrane-bounded organelle
rps1	GO:0043228	0.803	cellular component	non-membrane-bounded organelle
rps1	GO:0005829	0.803	cellular component	cytosol
rps1	GO:0032991	0.803	cellular component	protein-containing complex
rps1	GO:0016043	0.788	biological process	cellular component organization
rps1	GO:0071840	0.788	biological process	cellular component organization or biogenesis
rps1	GO:0006996	0.736	biological process	organelle organization
rps1	GO:0022607	0.733	biological process	cellular component assembly
rps1	GO:0044085	0.733	biological process	cellular component biogenesis
rps1	GO:0043933	0.711	biological process	protein-containing complex subunit organization
rps1	GO:0065003	0.692	biological process	protein-containing complex assembly
rps1	GO:0005739	0.667	cellular component	mitochondrion
rps1	GO:0070925	0.619	biological process	organelle assembly
rps1	GO:0065007	0.61	biological process	biological regulation
rps1	GO:0034622	0.603	biological process	cellular protein-containing complex assembly
rps1	GO:0050794	0.602	biological process	regulation of cellular process
rps1	GO:0050789	0.602	biological process	regulation of biological process
rps10	GO:0003674	0.999	molecular function	molecular_function
rps10	GO:0008150	0.998	biological process	biological_process
rps10	GO:0005575	0.998	cellular component	cellular_component
rps10	GO:0110165	0.997	cellular component	cellular anatomical entity
rps10	GO:0043229	0.991	cellular component	intracellular organelle
rps10	GO:0043226	0.991	cellular component	organelle
rps10	GO:0005622	0.991	cellular component	intracellular
rps10	GO:0005737	0.984	cellular component	cytoplasm
rps10	GO:0005488	0.978	molecular function	binding
rps10	GO:0043231	0.963	cellular component	intracellular membrane-bounded organelle
rps10	GO:0043227	0.963	cellular component	membrane-bounded organelle
rps10	GO:0005515	0.957	molecular function	protein binding
rps10	GO:0009987	0.89	biological process	cellular process
rps10	GO:0008152	0.862	biological process	metabolic process
rps10	GO:0071704	0.848	biological process	organic substance metabolic process
rps10	GO:0043232	0.843	cellular component	intracellular non-membrane-bounded organelle
rps10	GO:0043228	0.843	cellular component	non-membrane-bounded organelle
rps10	GO:0005198	0.836	molecular function	structural molecule activity
rps10	GO:0003735	0.836	molecular function	structural constituent of ribosome
rps10	GO:0010467	0.834	biological process	gene expression
rps10	GO:0043170	0.834	biological process	macromolecule metabolic process
rps10	GO:0032991	0.83	cellular component	protein-containing complex
rps10	GO:0034641	0.824	biological process	cellular nitrogen compound metabolic process
rps10	GO:0044237	0.824	biological process	cellular metabolic process
rps10	GO:0006807	0.824	biological process	nitrogen compound metabolic process
rps10	GO:0044238	0.8	biological process	primary metabolic process
rps10	GO:0005829	0.79	cellular component	cytosol
rps10	GO:0006412	0.787	biological process	translation
rps10	GO:0043043	0.787	biological process	peptide biosynthetic process
rps10	GO:0043604	0.787	biological process	amide biosynthetic process
rps10	GO:1901566	0.787	biological process	organonitrogen compound biosynthetic process
rps10	GO:0044271	0.787	biological process	cellular nitrogen compound biosynthetic process
rps10	GO:0009059	0.787	biological process	macromolecule biosynthetic process
rps10	GO:0043603	0.787	biological process	cellular amide metabolic process
rps10	GO:0044267	0.787	biological process	cellular protein metabolic process
rps10	GO:0006518	0.787	biological process	peptide metabolic process
rps10	GO:0034645	0.787	biological process	cellular macromolecule biosynthetic process
rps10	GO:0019538	0.787	biological process	protein metabolic process
rps10	GO:1901564	0.787	biological process	organonitrogen compound metabolic process
rps10	GO:0044249	0.787	biological process	cellular biosynthetic process
rps10	GO:1901576	0.787	biological process	organic substance biosynthetic process
rps10	GO:0044260	0.787	biological process	cellular macromolecule metabolic process
rps10	GO:0009058	0.787	biological process	biosynthetic process
rps10	GO:0005840	0.723	cellular component	ribosome
rps10	GO:0044391	0.723	cellular component	ribosomal subunit
rps10	GO:1990904	0.723	cellular component	ribonucleoprotein complex
rps10	GO:0005739	0.71	cellular component	mitochondrion
rps10	GO:0070013	0.685	cellular component	intracellular organelle lumen
rps10	GO:0043233	0.685	cellular component	organelle lumen
rps10	GO:0031974	0.685	cellular component	membrane-enclosed lumen
rps10	GO:0071840	0.675	biological process	cellular component organization or biogenesis
rps10	GO:0022626	0.66	cellular component	cytosolic ribosome
rps10	GO:0015935	0.659	cellular component	small ribosomal subunit
rps10	GO:0016020	0.606	cellular component	membrane
rps12	GO:0003674	0.999	molecular function	molecular_function
rps12	GO:0008150	0.998	biological process	biological_process
rps12	GO:0005575	0.998	cellular component	cellular_component
rps12	GO:0110165	0.997	cellular component	cellular anatomical entity
rps12	GO:0043229	0.993	cellular component	intracellular organelle
rps12	GO:0043226	0.993	cellular component	organelle
rps12	GO:0005622	0.993	cellular component	intracellular
rps12	GO:0005488	0.992	molecular function	binding
rps12	GO:0005737	0.991	cellular component	cytoplasm
rps12	GO:0005198	0.936	molecular function	structural molecule activity
rps12	GO:0003735	0.936	molecular function	structural constituent of ribosome
rps12	GO:0005515	0.932	molecular function	protein binding
rps12	GO:0009987	0.911	biological process	cellular process
rps12	GO:0043231	0.908	cellular component	intracellular membrane-bounded organelle
rps12	GO:0043227	0.908	cellular component	membrane-bounded organelle
rps12	GO:0043232	0.844	cellular component	intracellular non-membrane-bounded organelle
rps12	GO:0043228	0.844	cellular component	non-membrane-bounded organelle
rps12	GO:0032991	0.844	cellular component	protein-containing complex
rps12	GO:0050896	0.815	biological process	response to stimulus
rps12	GO:0043603	0.815	biological process	cellular amide metabolic process
rps12	GO:0034641	0.815	biological process	cellular nitrogen compound metabolic process
rps12	GO:0044237	0.815	biological process	cellular metabolic process
rps12	GO:0006807	0.815	biological process	nitrogen compound metabolic process
rps12	GO:0008152	0.815	biological process	metabolic process
rps12	GO:0044271	0.803	biological process	cellular nitrogen compound biosynthetic process
rps12	GO:0009059	0.803	biological process	macromolecule biosynthetic process
rps12	GO:0034645	0.803	biological process	cellular macromolecule biosynthetic process
rps12	GO:0043170	0.803	biological process	macromolecule metabolic process
rps12	GO:0044249	0.803	biological process	cellular biosynthetic process
rps12	GO:1901576	0.803	biological process	organic substance biosynthetic process
rps12	GO:0044260	0.803	biological process	cellular macromolecule metabolic process
rps12	GO:0071704	0.803	biological process	organic substance metabolic process
rps12	GO:0009058	0.803	biological process	biosynthetic process
rps12	GO:0006412	0.802	biological process	translation
rps12	GO:0043043	0.802	biological process	peptide biosynthetic process
rps12	GO:0043604	0.802	biological process	amide biosynthetic process
rps12	GO:1901566	0.802	biological process	organonitrogen compound biosynthetic process
rps12	GO:0010467	0.802	biological process	gene expression
rps12	GO:0044267	0.802	biological process	cellular protein metabolic process
rps12	GO:0006518	0.802	biological process	peptide metabolic process
rps12	GO:0019538	0.802	biological process	protein metabolic process
rps12	GO:1901564	0.802	biological process	organonitrogen compound metabolic process
rps12	GO:0044238	0.802	biological process	primary metabolic process
rps12	GO:0005829	0.793	cellular component	cytosol
rps12	GO:0006950	0.791	biological process	response to stress
rps12	GO:0016043	0.702	biological process	cellular component organization
rps12	GO:0071840	0.702	biological process	cellular component organization or biogenesis
rps12	GO:0044085	0.697	biological process	cellular component biogenesis
rps12	GO:0043933	0.68	biological process	protein-containing complex subunit organization
rps12	GO:0022607	0.669	biological process	cellular component assembly
rps12	GO:0005739	0.669	cellular component	mitochondrion
rps12	GO:0065007	0.667	biological process	biological regulation
rps12	GO:0009628	0.652	biological process	response to abiotic stimulus
rps12	GO:1990904	0.652	cellular component	ribonucleoprotein complex
rps12	GO:0050789	0.64	biological process	regulation of biological process
rps12	GO:0005840	0.615	cellular component	ribosome
rps12	GO:0044391	0.615	cellular component	ribosomal subunit
rps12	GO:0065003	0.613	biological process	protein-containing complex assembly
rps13	GO:0003674	0.999	molecular function	molecular_function
rps13	GO:0008150	0.998	biological process	biological_process
rps13	GO:0005575	0.998	cellular component	cellular_component
rps13	GO:0110165	0.993	cellular component	cellular anatomical entity
rps13	GO:0005488	0.985	molecular function	binding
rps13	GO:0005515	0.976	molecular function	protein binding
rps13	GO:0005622	0.967	cellular component	intracellular
rps13	GO:0005737	0.965	cellular component	cytoplasm
rps13	GO:0043229	0.935	cellular component	intracellular organelle
rps13	GO:0043226	0.935	cellular component	organelle
rps13	GO:0043231	0.879	cellular component	intracellular membrane-bounded organelle
rps13	GO:0043227	0.879	cellular component	membrane-bounded organelle
rps13	GO:0009987	0.859	biological process	cellular process
rps13	GO:0005198	0.827	molecular function	structural molecule activity
rps13	GO:0003735	0.827	molecular function	structural constituent of ribosome
rps13	GO:0032991	0.813	cellular component	protein-containing complex
rps13	GO:0043232	0.773	cellular component	intracellular non-membrane-bounded organelle
rps13	GO:0043228	0.773	cellular component	non-membrane-bounded organelle
rps13	GO:0005829	0.764	cellular component	cytosol
rps13	GO:1901363	0.758	molecular function	heterocyclic compound binding
rps13	GO:0097159	0.758	molecular function	organic cyclic compound binding
rps13	GO:0008152	0.714	biological process	metabolic process
rps13	GO:0044085	0.682	biological process	cellular component biogenesis
rps13	GO:0071840	0.682	biological process	cellular component organization or biogenesis
rps13	GO:0044237	0.682	biological process	cellular metabolic process
rps13	GO:0005840	0.672	cellular component	ribosome
rps13	GO:0044391	0.672	cellular component	ribosomal subunit
rps13	GO:1990904	0.672	cellular component	ribonucleoprotein complex
rps13	GO:0003676	0.669	molecular function	nucleic acid binding
rps13	GO:0050896	0.666	biological process	response to stimulus
rps13	GO:0016043	0.66	biological process	cellular component organization
rps13	GO:0009059	0.66	biological process	macromolecule biosynthetic process
rps13	GO:0034645	0.66	biological process	cellular macromolecule biosynthetic process
rps13	GO:0043170	0.66	biological process	macromolecule metabolic process
rps13	GO:0044249	0.66	biological process	cellular biosynthetic process
rps13	GO:1901576	0.66	biological process	organic substance biosynthetic process
rps13	GO:0044260	0.66	biological process	cellular macromolecule metabolic process
rps13	GO:0071704	0.66	biological process	organic substance metabolic process
rps13	GO:0009058	0.66	biological process	biosynthetic process
rps13	GO:0006412	0.648	biological process	translation
rps13	GO:0043043	0.648	biological process	peptide biosynthetic process
rps13	GO:0043604	0.648	biological process	amide biosynthetic process
rps13	GO:1901566	0.648	biological process	organonitrogen compound biosynthetic process
rps13	GO:0010467	0.648	biological process	gene expression
rps13	GO:0043603	0.648	biological process	cellular amide metabolic process
rps13	GO:0044267	0.648	biological process	cellular protein metabolic process
rps13	GO:0006518	0.648	biological process	peptide metabolic process
rps13	GO:0019538	0.648	biological process	protein metabolic process
rps13	GO:1901564	0.648	biological process	organonitrogen compound metabolic process
rps13	GO:0034641	0.648	biological process	cellular nitrogen compound metabolic process
rps13	GO:0044238	0.648	biological process	primary metabolic process
rps13	GO:0006807	0.648	biological process	nitrogen compound metabolic process
rps13	GO:0043933	0.646	biological process	protein-containing complex subunit organization
rps13	GO:0005739	0.643	cellular component	mitochondrion
rps13	GO:0003723	0.616	molecular function	RNA binding
rps13	GO:0003729	0.601	molecular function	mRNA binding
rps19	GO:0003674	0.999	molecular function	molecular_function
rps19	GO:0008150	0.998	biological process	biological_process
rps19	GO:0005575	0.998	cellular component	cellular_component
rps19	GO:0110165	0.997	cellular component	cellular anatomical entity
rps19	GO:0005622	0.993	cellular component	intracellular
rps19	GO:0005488	0.991	molecular function	binding
rps19	GO:0043229	0.991	cellular component	intracellular organelle
rps19	GO:0043226	0.991	cellular component	organelle
rps19	GO:0005737	0.991	cellular component	cytoplasm
rps19	GO:0043232	0.912	cellular component	intracellular non-membrane-bounded organelle
rps19	GO:0043228	0.912	cellular component	non-membrane-bounded organelle
rps19	GO:0032991	0.912	cellular component	protein-containing complex
rps19	GO:0005515	0.906	molecular function	protein binding
rps19	GO:0043231	0.906	cellular component	intracellular membrane-bounded organelle
rps19	GO:0043227	0.906	cellular component	membrane-bounded organelle
rps19	GO:0005829	0.898	cellular component	cytosol
rps19	GO:0005198	0.87	molecular function	structural molecule activity
rps19	GO:0003735	0.87	molecular function	structural constituent of ribosome
rps19	GO:0042254	0.795	biological process	ribosome biogenesis
rps19	GO:0022613	0.795	biological process	ribonucleoprotein complex biogenesis
rps19	GO:0044085	0.795	biological process	cellular component biogenesis
rps19	GO:0071840	0.795	biological process	cellular component organization or biogenesis
rps19	GO:0009987	0.787	biological process	cellular process
rps19	GO:0005739	0.739	cellular component	mitochondrion
rps19	GO:1990904	0.729	cellular component	ribonucleoprotein complex
rps19	GO:0050896	0.722	biological process	response to stimulus
rps19	GO:0042255	0.704	biological process	ribosome assembly
rps19	GO:0070925	0.704	biological process	organelle assembly
rps19	GO:0022607	0.704	biological process	cellular component assembly
rps19	GO:0006996	0.704	biological process	organelle organization
rps19	GO:0016043	0.704	biological process	cellular component organization
rps19	GO:0006950	0.68	biological process	response to stress
rps19	GO:0071704	0.644	biological process	organic substance metabolic process
rps19	GO:0044237	0.644	biological process	cellular metabolic process
rps19	GO:0008152	0.644	biological process	metabolic process
rps19	GO:0044238	0.632	biological process	primary metabolic process
rps19	GO:0006807	0.632	biological process	nitrogen compound metabolic process
rps19	GO:0006412	0.621	biological process	translation
rps19	GO:0043043	0.621	biological process	peptide biosynthetic process
rps19	GO:0043604	0.621	biological process	amide biosynthetic process
rps19	GO:1901566	0.621	biological process	organonitrogen compound biosynthetic process
rps19	GO:0044271	0.621	biological process	cellular nitrogen compound biosynthetic process
rps19	GO:0009059	0.621	biological process	macromolecule biosynthetic process
rps19	GO:0010467	0.621	biological process	gene expression
rps19	GO:0043603	0.621	biological process	cellular amide metabolic process
rps19	GO:0044267	0.621	biological process	cellular protein metabolic process
rps19	GO:0006518	0.621	biological process	peptide metabolic process
rps19	GO:0034645	0.621	biological process	cellular macromolecule biosynthetic process
rps19	GO:0019538	0.621	biological process	protein metabolic process
rps19	GO:1901564	0.621	biological process	organonitrogen compound metabolic process
rps19	GO:0043170	0.621	biological process	macromolecule metabolic process
rps19	GO:0044249	0.621	biological process	cellular biosynthetic process
rps19	GO:1901576	0.621	biological process	organic substance biosynthetic process
rps19	GO:0034641	0.621	biological process	cellular nitrogen compound metabolic process
rps19	GO:0044260	0.621	biological process	cellular macromolecule metabolic process
rps19	GO:0009058	0.621	biological process	biosynthetic process
rps3	GO:0003674	0.999	molecular function	molecular_function
rps3	GO:0008150	0.998	biological process	biological_process
rps3	GO:0005575	0.998	cellular component	cellular_component
rps3	GO:0005488	0.996	molecular function	binding
rps3	GO:0005515	0.987	molecular function	protein binding
rps3	GO:0110165	0.985	cellular component	cellular anatomical entity
rps3	GO:0043229	0.98	cellular component	intracellular organelle
rps3	GO:0043226	0.98	cellular component	organelle
rps3	GO:0005622	0.98	cellular component	intracellular
rps3	GO:0005737	0.978	cellular component	cytoplasm
rps3	GO:0043231	0.916	cellular component	intracellular membrane-bounded organelle
rps3	GO:0043227	0.916	cellular component	membrane-bounded organelle
rps3	GO:0005829	0.861	cellular component	cytosol
rps3	GO:0009987	0.859	biological process	cellular process
rps3	GO:0005198	0.85	molecular function	structural molecule activity
rps3	GO:0050896	0.839	biological process	response to stimulus
rps3	GO:0032991	0.834	cellular component	protein-containing complex
rps3	GO:0043232	0.808	cellular component	intracellular non-membrane-bounded organelle
rps3	GO:0043228	0.808	cellular component	non-membrane-bounded organelle
rps3	GO:0016043	0.8	biological process	cellular component organization
rps3	GO:0071840	0.8	biological process	cellular component organization or biogenesis
rps3	GO:0003735	0.791	molecular function	structural constituent of ribosome
rps3	GO:0005739	0.729	cellular component	mitochondrion
rps3	GO:0022607	0.726	biological process	cellular component assembly
rps3	GO:0044085	0.726	biological process	cellular component biogenesis
rps3	GO:0042255	0.724	biological process	ribosome assembly
rps3	GO:0070925	0.724	biological process	organelle assembly
rps3	GO:0042254	0.724	biological process	ribosome biogenesis
rps3	GO:0006996	0.724	biological process	organelle organization
rps3	GO:0022613	0.724	biological process	ribonucleoprotein complex biogenesis
rps3	GO:0006950	0.719	biological process	response to stress
rps3	GO:0065007	0.697	biological process	biological regulation
rps3	GO:0050789	0.653	biological process	regulation of biological process
rps3	GO:0050794	0.611	biological process	regulation of cellular process
rps3	GO:0043933	0.608	biological process	protein-containing complex subunit organization
rps4	GO:0003674	0.999	molecular function	molecular_function
rps4	GO:0005488	0.998	molecular function	binding
rps4	GO:0005575	0.998	cellular component	cellular_component
rps4	GO:0110165	0.997	cellular component	cellular anatomical entity
rps4	GO:0005515	0.987	molecular function	protein binding
rps4	GO:0043226	0.987	cellular component	organelle
rps4	GO:0043227	0.984	cellular component	membrane-bounded organelle
rps4	GO:0008150	0.983	biological process	biological_process
rps4	GO:0009987	0.924	biological process	cellular process
rps4	GO:0005622	0.903	cellular component	intracellular
rps4	GO:0005737	0.899	cellular component	cytoplasm
rps4	GO:1901363	0.872	molecular function	heterocyclic compound binding
rps4	GO:0097159	0.872	molecular function	organic cyclic compound binding
rps4	GO:0043229	0.867	cellular component	intracellular organelle
rps4	GO:0003676	0.865	molecular function	nucleic acid binding
rps4	GO:0043231	0.849	cellular component	intracellular membrane-bounded organelle
rps4	GO:0005198	0.837	molecular function	structural molecule activity
rps4	GO:0003735	0.837	molecular function	structural constituent of ribosome
rps4	GO:0003723	0.835	molecular function	RNA binding
rps4	GO:0016020	0.799	cellular component	membrane
rps4	GO:0031090	0.759	cellular component	organelle membrane
rps4	GO:0065007	0.745	biological process	biological regulation
rps4	GO:0019843	0.741	molecular function	rRNA binding
rps4	GO:0005739	0.717	cellular component	mitochondrion
rps4	GO:0003729	0.702	molecular function	mRNA binding
rps4	GO:0050794	0.68	biological process	regulation of cellular process
rps4	GO:0050789	0.68	biological process	regulation of biological process
rps4	GO:0045182	0.656	molecular function	translation regulator activity
rps4	GO:0048027	0.609	molecular function	mRNA 5'-UTR binding
rps4	GO:0090079	0.609	molecular function	translation regulator activity, nucleic acid binding
rps4	GO:0000900	0.609	molecular function	translation repressor activity, mRNA regulatory element binding
rps4	GO:0030371	0.609	molecular function	translation repressor activity
sdh3	GO:0003674	0.999	molecular function	molecular_function
sdh3	GO:0008150	0.998	biological process	biological_process
sdh3	GO:0005575	0.998	cellular component	cellular_component
sdh3	GO:0110165	0.996	cellular component	cellular anatomical entity
sdh3	GO:0005488	0.993	molecular function	binding
sdh3	GO:0005622	0.986	cellular component	intracellular
sdh3	GO:0016020	0.954	cellular component	membrane
sdh3	GO:0005515	0.935	molecular function	protein binding
sdh3	GO:0003824	0.921	molecular function	catalytic activity
sdh3	GO:0043227	0.917	cellular component	membrane-bounded organelle
sdh3	GO:0043229	0.917	cellular component	intracellular organelle
sdh3	GO:0043226	0.917	cellular component	organelle
sdh3	GO:0009987	0.905	biological process	cellular process
sdh3	GO:0005737	0.904	cellular component	cytoplasm
sdh3	GO:0043231	0.902	cellular component	intracellular membrane-bounded organelle
sdh3	GO:0016491	0.896	molecular function	oxidoreductase activity
sdh3	GO:0005739	0.876	cellular component	mitochondrion
sdh3	GO:1901363	0.87	molecular function	heterocyclic compound binding
sdh3	GO:0097159	0.87	molecular function	organic cyclic compound binding
sdh3	GO:0032991	0.862	cellular component	protein-containing complex
sdh3	GO:0000104	0.859	molecular function	succinate dehydrogenase activity
sdh3	GO:0016627	0.859	molecular function	oxidoreductase activity, acting on the CH-CH group of donors
sdh3	GO:0016635	0.845	molecular function	oxidoreductase activity, acting on the CH-CH group of donors, quinone or related compound as acceptor
sdh3	GO:0008177	0.845	molecular function	succinate dehydrogenase (ubiquinone) activity
sdh3	GO:0008152	0.824	biological process	metabolic process
sdh3	GO:0098796	0.818	cellular component	membrane protein complex
sdh3	GO:0044237	0.802	biological process	cellular metabolic process
sdh3	GO:0050896	0.785	biological process	response to stimulus
sdh3	GO:0055114	0.766	biological process	oxidation-reduction process
sdh3	GO:0031967	0.76	cellular component	organelle envelope
sdh3	GO:0031975	0.76	cellular component	envelope
sdh3	GO:0006091	0.757	biological process	generation of precursor metabolites and energy
sdh3	GO:0031090	0.756	cellular component	organelle membrane
sdh3	GO:0048037	0.732	molecular function	cofactor binding
sdh3	GO:0046906	0.732	molecular function	tetrapyrrole binding
sdh3	GO:0020037	0.732	molecular function	heme binding
sdh3	GO:0022900	0.71	biological process	electron transport chain
sdh3	GO:0098803	0.688	cellular component	respiratory chain complex
sdh3	GO:0070469	0.688	cellular component	respirasome
sdh3	GO:0045273	0.684	cellular component	respiratory chain complex II
sdh3	GO:0006950	0.629	biological process	response to stress
sdh3	GO:0045333	0.622	biological process	cellular respiration
sdh3	GO:0015980	0.622	biological process	energy derivation by oxidation of organic compounds
sdh3	GO:0006796	0.62	biological process	phosphate-containing compound metabolic process
sdh3	GO:0006793	0.62	biological process	phosphorus metabolic process
sdh3	GO:0046034	0.608	biological process	ATP metabolic process
sdh4	GO:0008150	0.998	biological process	biological_process
sdh4	GO:0005575	0.998	cellular component	cellular_component
sdh4	GO:0003674	0.997	molecular function	molecular_function
sdh4	GO:0110165	0.996	cellular component	cellular anatomical entity
sdh4	GO:0005622	0.989	cellular component	intracellular
sdh4	GO:0005488	0.987	molecular function	binding
sdh4	GO:0043229	0.956	cellular component	intracellular organelle
sdh4	GO:0043226	0.956	cellular component	organelle
sdh4	GO:0043227	0.953	cellular component	membrane-bounded organelle
sdh4	GO:0043231	0.952	cellular component	intracellular membrane-bounded organelle
sdh4	GO:0005515	0.949	molecular function	protein binding
sdh4	GO:0005737	0.945	cellular component	cytoplasm
sdh4	GO:0016020	0.924	cellular component	membrane
sdh4	GO:0032991	0.918	cellular component	protein-containing complex
sdh4	GO:0009987	0.917	biological process	cellular process
sdh4	GO:0045333	0.902	biological process	cellular respiration
sdh4	GO:0006091	0.902	biological process	generation of precursor metabolites and energy
sdh4	GO:0015980	0.902	biological process	energy derivation by oxidation of organic compounds
sdh4	GO:0055114	0.902	biological process	oxidation-reduction process
sdh4	GO:0008152	0.902	biological process	metabolic process
sdh4	GO:0044237	0.896	biological process	cellular metabolic process
sdh4	GO:0005739	0.87	cellular component	mitochondrion
sdh4	GO:0098796	0.849	cellular component	membrane protein complex
sdh4	GO:0044238	0.831	biological process	primary metabolic process
sdh4	GO:0031090	0.823	cellular component	organelle membrane
sdh4	GO:0009060	0.794	biological process	aerobic respiration
sdh4	GO:0031967	0.77	cellular component	organelle envelope
sdh4	GO:0031975	0.77	cellular component	envelope
sdh4	GO:0006099	0.761	biological process	tricarboxylic acid cycle
sdh4	GO:0098803	0.699	cellular component	respiratory chain complex
sdh4	GO:0070469	0.699	cellular component	respirasome
sdh4	GO:0031966	0.696	cellular component	mitochondrial membrane
sdh4	GO:0005740	0.696	cellular component	mitochondrial envelope
sdh4	GO:1902494	0.692	cellular component	catalytic complex
sdh4	GO:0019866	0.666	cellular component	organelle inner membrane
sdh4	GO:0005743	0.666	cellular component	mitochondrial inner membrane
sdh4	GO:0098798	0.666	cellular component	mitochondrial protein complex
sdh4	GO:0045273	0.641	cellular component	respiratory chain complex II
sdh4	GO:0003824	0.635	molecular function	catalytic activity
